# Supplementary material
Source: publisher figshare collection journal article supplement (https://plos.figshare.com/articles/dataset/_/7128626)
Supplement: Supplementary file 1 [file 1]

Archive with 9 entries (9 files):
- pcbi.1006497.s001.tif
- pcbi.1006497.s002.tif
- pcbi.1006497.s003.tif
- pcbi.1006497.s004.tif
- pcbi.1006497.s005.tif
- pcbi.1006497.s006.tif
- pcbi.1006497.s007.tif
- pcbi.1006497.s008.xlsx
- pcbi.1006497.s009.pdf
