# Supplementary material
Source: publisher figshare collection journal article supplement (https://plos.figshare.com/articles/dataset/_/7128626)
Supplement: Supplementary file 1 [file 1 › pcbi.1006497.s008.xlsx]

## Sheet: Sheet1
Fig 1A
Structural connectivity strength
	0	0.020054	0	0.08472	0	0.0059523	0	0	0.005278	0	0.013598	0	0	0	0	0	0.01111	0	0	0	0	0	0	0	0	0	0	0	0	0	0	0	0.030373	0.011003	0	0	0	0	0	0	0	0	0	0	0	0	0	0	0
	0.020054	0	0	0.010057	0	0	0	0	0	0	0.10101	0	0	0	0	0	0.062687	0	0	0	0	0	0	0	0	0	0	0	0	0	0	0	0	0	0	0	0	0	0	0	0	0	0	0	0	0	0	0	0
	0	0	0	0.0024759	0.14468	0	0	0	0.10311	0	0	0	0	0	0	0.0063696	0	0	0	0	0	0	0.012563	0	0	0	0	0	0.019606	0	0	0.016785	0.0077672	0.065944	0	0	0	0	0	0	0	0	0	0	0	0	0	0	0
	0.08472	0.010057	0.0024759	0	0.0028005	0.075218	0	0	0	0	0	0	0	0	0	0	0	0	0	0	0	0	0	0	0	0	0	0	0	0	0.010169	0.0092744	0.062422	0.0075519	0	0	0	0	0	0	0	0	0	0	0	0	0	0	0
	0	0	0.14468	0.0028005	0	0.0022763	0	0	0.014842	0.0012957	0	0	0	0	0	0	0	0	0	0	0	0	0.028667	0	0	0	0	0	0.091127	0.017909	0.011107	0.024944	0.0050079	0.010128	0	0	0	0	0	0	0	0	0	0	0	0	0	0	0
	0.0059523	0	0	0.075218	0.0022763	0	0	0	0	0	0.0026494	0	0	0	0	0	0	0	0.00232	0	0	0.035693	0	0	0	0.00039946	0	0	0.0073264	0.013938	0.039752	0.0085924	0	0	0	0.0042515	0	0	0.020279	0.09639	0	0.0009724	0	0	0.0053208	0.0014774	0.017471	0.0061021	0
	0	0	0	0	0	0	0	0.036766	0.0085396	0.069275	0	0	0	0	0	0.063193	0	0.010999	0	0	0	0	0	0	0	0	0	0	0	0	0	0	0	0	0.0023744	0	0	0	0	0	0	0	0.0074332	0	0	0	0	0	0
	0	0	0	0	0	0	0.036766	0	0	0.023528	0	0	0	0	0	0.11231	0	0.021711	0	0	0	0	0	0	0	0	0	0	0	0	0	0	0	0	0.021052	0	0	0	0	0	0	0	0	0	0	0	0	0	0
	0.005278	0	0.10311	0	0.014842	0	0.0085396	0	0	0.014785	0	0	0	0	0	0.008838	0	0	0	0	0	0	0	0	0	0	0	0	0	0	0	0	0.0049607	0.085981	0	0	0	0	0	0	0	0	0	0	0	0	0	0	0
	0	0	0	0	0.0012957	0	0.069275	0.023528	0.014785	0	0	0	0	0	0	0.087349	0	0	0	0	0.0026733	0	0.0029096	0	0	0	0	0	0.0016374	0	0	0.002089	0	0.0009481	0.0092114	0	0	0	0	0	0	0	0	0	0	0.001031	0	0	0
	0.013598	0.10101	0	0	0	0.0026494	0	0	0	0	0	0	0	0	0	0	0.06428	0	0.0067502	0	0	0.0064522	0	0	0	0	0	0	0	0	0.0021587	0	0.0034493	0	0	0.01229	0	0	0	0	0	0.0068925	0	0.0036574	0.001451	0	0	0	0
	0	0	0	0	0	0	0	0	0	0	0	0	0.016118	0	0	0	0	0	0	0.078594	0	0	0	0.018895	0.002294	0.075222	0.012822	0	0	0.00896	0	0.0055732	0	0.0025073	0	0	0.063502	0	0	0	0	0	0	0	0	0	0	0.0026788	0
	0	0	0	0	0	0	0	0	0	0	0	0.016118	0	0	0	0	0	0	0	0	0	0	0	0.0087376	0.084512	0.0083621	0	0.016974	0	0	0.0063994	0	0.0073873	0	0	0	0	0.050155	0	0	0	0.004633	0	0	0	0	0	0.00041007	0
	0	0	0	0	0	0	0	0	0	0	0	0	0	0	0	0	0	0	0	0	0.069519	0	0.016183	0	0	0	0	0	0.0084472	0	0	0	0	0	0.0055038	0	0	0	0	0	0	0	0	0	0	0.042881	0	0.0064787	0
	0	0	0	0	0	0	0	0	0	0	0	0	0	0	0	0	0	0	0.0016425	0	0	0.00053394	0	0	0	0.0020031	0.0055876	0.022345	0.010761	0.020557	0.034355	0	0	0	0	0.0080872	0	0	0.10925	0.20663	0	0	0	0	0.0033381	0.015597	0.056114	0.066302	0.068366
	0	0	0.0063696	0	0	0	0.063193	0.11231	0.008838	0.087349	0	0	0	0	0	0	0	0.05261	0	0	0	0	0	0	0	0	0	0	0	0	0	0	0	0	0.0053123	0	0	0	0	0	0	0	0.013594	0	0	0	0	0	0
	0.01111	0.062687	0	0	0	0	0	0	0	0	0.06428	0	0	0	0	0	0	0	0.06298	0	0	0	0	0	0	0	0	0	0	0	0.002333	0	0.0010929	0	0	0	0	0	0	0	0	0	0	0.008787	0	0	0	0	0
	0	0	0	0	0	0	0.010999	0.021711	0	0	0	0	0	0	0	0.05261	0	0	0	0	0	0	0	0	0	0	0	0	0	0	0	0	0	0	0.049763	0	0	0	0	0	0	0	0.05536	0	0	0.0021458	0	0	0
	0	0	0	0	0	0.00232	0	0	0	0	0.0067502	0	0	0	0.0016425	0	0.06298	0	0	0	0	0	0	0	0	0	0	0	0	0	0	0	0	0	0	0.034334	0	0	0	0.0039703	0	0	0	0.047153	0	0	0.0033463	0	0
	0	0	0	0	0	0	0	0	0	0	0	0.078594	0	0	0	0	0	0	0	0	0	0	0.00063335	0	0	0.023823	0	0	0	0	0	0	0	0	0	0	0.29116	0	0	0	0.052467	0	0	0	0	0	0	0	0
	0	0	0	0	0	0	0	0	0	0.0026733	0	0	0	0.069519	0	0	0	0	0	0	0	0	0.077401	0	0	0	0	0	0.065048	0.0044544	0	0	0	0	0.0083364	0	0	0	0	0	0.0025643	0	0	0	0	0.032948	0	0	0
	0	0	0	0	0	0.035693	0	0	0	0	0.0064522	0	0	0	0.00053394	0	0	0	0	0	0	0	0	0	0	0	0	0	0	0	0	0	0	0	0	0	0	0	0	0	0	0	0	0	0.050195	0	0.025396	0	0
	0	0	0.012563	0	0.028667	0	0	0	0	0.0029096	0	0	0	0.016183	0	0	0	0	0	0.00063335	0.077401	0	0	0	0	0	0	0	0.020637	0.0055053	0	0.0070112	0	0.0045775	0	0	0	0	0	0	0.00066391	0	0	0	0	0	0	0	0
	0	0	0	0	0	0	0	0	0	0	0	0.018895	0.0087376	0	0	0	0	0	0	0	0	0	0	0	0.0029804	0.051379	0.0081735	0	0	0.006741	0.00046212	0.0063552	0	0.0038834	0	0	0	0.0012785	0	0	0	0	0	0	0	0	0	0	0
	0	0	0	0	0	0	0	0	0	0	0	0.002294	0.084512	0	0	0	0	0	0	0	0	0	0	0.0029804	0	0.02226	0.0022337	0.014623	0	0.0011388	0.0052509	0.00091996	0.0039459	0	0	0	0	0.016084	0	0	0	0.0026778	0	0	0	0	0	0.0005017	0
	0	0	0	0	0	0.00039946	0	0	0	0	0	0.075222	0.0083621	0	0.0020031	0	0	0	0	0.023823	0	0	0	0.051379	0.02226	0	0.01116	0.0016864	0	0.013065	0.00090528	0.0090799	0.000742	0.0041874	0	0	0.023773	0.0011803	0	0.001865	0.0018895	0	0	0	0	0	0	0.0015454	0.0024376
	0	0	0	0	0	0	0	0	0	0	0	0.012822	0	0	0.0055876	0	0	0	0	0	0	0	0	0.0081735	0.0022337	0.01116	0	0.0070443	0	0.036834	0.005272	0	0	0	0	0	0	0	0	0	0	0	0	0	0	0	0	0.024998	0.0041184
	0	0	0	0	0	0	0	0	0	0	0	0	0.016974	0	0.022345	0	0	0	0	0	0	0	0	0	0.014623	0.0016864	0.0070443	0	0	0.0065995	0.036095	0.0022003	0	0	0	0	0	0	0.0048228	0	0	0	0	0	0	0	0	0.0042453	0.020188
	0	0	0.019606	0	0.091127	0.0073264	0	0	0	0.0016374	0	0	0	0.0084472	0.010761	0	0	0	0	0	0.065048	0	0.020637	0	0	0	0	0	0	0.04399	0.023332	0	0.0028781	0	0.004321	0	0.0014709	0	0.071753	0.036507	0.0009423	0	0.00037254	0	0	0.046524	0.0021097	0	0
	0	0	0	0	0.017909	0.013938	0	0	0	0	0	0.00896	0	0	0.020557	0	0	0	0	0	0.0044544	0	0.0055053	0.006741	0.0011388	0.013065	0.036834	0.0065995	0.04399	0	0.10308	0.085864	0.0066434	0	0	0	0.0021905	0	0.049089	0.064629	0.00017397	0	0	0	0	0	0	0.021027	0
	0	0	0	0.010169	0.011107	0.039752	0	0	0	0	0.0021587	0	0.0063994	0	0.034355	0	0.002333	0	0	0	0	0	0	0.00046212	0.0052509	0.00090528	0.005272	0.036095	0.023332	0.10308	0	0.070276	0.071424	0.0031941	0	0	0	0	0.062927	0.046633	0	0	0	0	0	0	0	0.012916	0
	0	0	0.016785	0.0092744	0.024944	0.0085924	0	0	0	0.002089	0	0.0055732	0	0	0	0	0	0	0	0	0	0	0.0070112	0.0063552	0.00091996	0.0090799	0	0.0022003	0	0.085864	0.070276	0	0.11475	0.096099	0	0	0	0	0	0.0099826	0.00046231	0	0.0016071	0	0	0	0	0	0
	0.030373	0	0.0077672	0.062422	0.0050079	0	0	0	0.0049607	0	0.0034493	0	0.0073873	0	0	0	0.0010929	0	0	0	0	0	0	0	0.0039459	0.000742	0	0	0.0028781	0.0066434	0.071424	0.11475	0	0.10506	0	0	0	0	0	0	0	0	0	0.0017049	0	0	0	0	0
	0.011003	0	0.065944	0.0075519	0.010128	0	0	0	0.085981	0.0009481	0	0.0025073	0	0	0	0	0	0	0	0	0	0	0.0045775	0.0038834	0	0.0041874	0	0	0	0	0.0031941	0.096099	0.10506	0	0	0	0	0	0	0	0	0	0	0	0	0	0	0	0
	0	0	0	0	0	0	0.0023744	0.021052	0	0.0092114	0	0	0	0.0055038	0	0.0053123	0	0.049763	0	0	0.0083364	0	0	0	0	0	0	0	0.004321	0	0	0	0	0	0	0	0	0	0	0.00046422	0.0020275	0	0	0	0	0.0064685	0	0.0033188	0
	0	0	0	0	0	0.0042515	0	0	0	0	0.01229	0	0	0	0.0080872	0	0	0	0.034334	0	0	0	0	0	0	0	0	0	0	0	0	0	0	0	0	0	0	0	0	0.013662	0	0	0	0	0.01207	0	0.014542	0	0.012621
	0	0	0	0	0	0	0	0	0	0	0	0.063502	0	0	0	0	0	0	0	0.29116	0	0	0	0	0	0.023773	0	0	0.0014709	0.0021905	0	0	0	0	0	0	0	0	0	0	0.043249	0	0	0	0	0	0	0	0
	0	0	0	0	0	0	0	0	0	0	0	0	0.050155	0	0	0	0	0	0	0	0	0	0	0.0012785	0.016084	0.0011803	0	0	0	0	0	0	0	0	0	0	0	0	0	0	0	0.057224	0	0	0	0	0	0	0
	0	0	0	0	0	0.020279	0	0	0	0	0	0	0	0	0.10925	0	0	0	0	0	0	0	0	0	0	0	0	0.0048228	0.071753	0.049089	0.062927	0	0	0	0	0	0	0	0	0.19625	0.00054235	0	0	0	0	0.030424	0	0.12381	0.012515
	0	0	0	0	0	0.09639	0	0	0	0	0	0	0	0	0.20663	0	0	0	0.0039703	0	0	0	0	0	0	0.001865	0	0	0.036507	0.064629	0.046633	0.0099826	0	0	0.00046422	0.013662	0	0	0.19625	0	0	0	0	0	0.0061578	0.0181	0.077945	0.058043	0
	0	0	0	0	0	0	0	0	0	0	0	0	0	0	0	0	0	0	0	0.052467	0.0025643	0	0.00066391	0	0	0.0018895	0	0	0.0009423	0.00017397	0	0.00046231	0	0	0.0020275	0	0.043249	0	0.00054235	0	0	0	0.063037	0	0	0	0	0	0
	0	0	0	0	0	0.0009724	0	0	0	0	0.0068925	0	0.004633	0	0	0	0	0	0	0	0	0	0	0	0.0026778	0	0	0	0	0	0	0	0	0	0	0	0	0.057224	0	0	0	0	0	0.068536	0	0	0	0	0
	0	0	0	0	0	0	0.0074332	0	0	0	0	0	0	0	0	0.013594	0	0.05536	0	0	0	0	0	0	0	0	0	0	0.00037254	0	0	0.0016071	0	0	0	0	0	0	0	0	0.063037	0	0	0	0	0	0	0	0
	0	0	0	0	0	0	0	0	0	0	0.0036574	0	0	0	0	0	0.008787	0	0.047153	0	0	0	0	0	0	0	0	0	0	0	0	0	0.0017049	0	0	0	0	0	0	0	0	0.068536	0	0	0	0	0	0	0
	0	0	0	0	0	0.0053208	0	0	0	0	0.001451	0	0	0	0.0033381	0	0	0	0	0	0	0.050195	0	0	0	0	0	0	0	0	0	0	0	0	0	0.01207	0	0	0	0.0061578	0	0	0	0	0	0	0.03791	0.00158	0.01992
	0	0	0	0	0	0.0014774	0	0	0	0.001031	0	0	0	0.042881	0.015597	0	0	0.0021458	0	0	0.032948	0	0	0	0	0	0	0	0.046524	0	0	0	0	0	0.0064685	0	0	0	0.030424	0.0181	0	0	0	0	0	0	0	0.051098	0.0055988
	0	0	0	0	0	0.017471	0	0	0	0	0	0	0	0	0.056114	0	0	0	0.0033463	0	0	0.025396	0	0	0	0	0	0	0.0021097	0	0	0	0	0	0	0.014542	0	0	0	0.077945	0	0	0	0	0.03791	0	0	0.0044995	0.014116
	0	0	0	0	0	0.0061021	0	0	0	0	0	0.0026788	0.00041007	0.0064787	0.066302	0	0	0	0	0	0	0	0	0	0.0005017	0.0015454	0.024998	0.0042453	0	0.021027	0.012916	0	0	0	0.0033188	0	0	0	0.12381	0.058043	0	0	0	0	0.00158	0.051098	0.0044995	0	0.018766
	0	0	0	0	0	0	0	0	0	0	0	0	0	0	0.068366	0	0	0	0	0	0	0	0	0	0	0.0024376	0.0041184	0.020188	0	0	0	0	0	0	0	0.012621	0	0	0.012515	0	0	0	0	0	0.01992	0.0055988	0.014116	0.018766	0
	0	0	0	0	0	0	0	0	0	0	0	0.010813	0	0.0084871	0.0056733	0	0	0.037607	0	0.038685	0	0	0.0021452	0	0	0.0053924	0	0	0.0040775	0	0	0	0	0	0.030989	0	0.11502	0	0	0	0.029929	0	0.03324	0	0	0.012757	0	0.011192	0
	0	0	0	0	0	0.013939	0	0	0	0	0.0027722	0	0	0	0.029078	0	0	0	0.058943	0	0	0	0	0	0.0072519	0.00050607	0	0.0055703	0	0	0.0011108	0	0	0	0.00072069	0.063634	0	0.14539	0	0.071487	0	0.034615	0	0.046322	0.01268	0	0.048409	0.0048283	0.040918
	0	0	0	0	0.0025548	0	0.0056273	0.0064105	0	0.080862	0	0	0	0	0	0.068586	0	0.0087941	0	0	0.0056098	0	0.0049029	0	0	0	0	0	0.0040889	0.0011959	0	0.0017702	0	0	0.021017	0	0	0	0	0	0.0080029	0	0.0054239	0	0	0.0026795	0	0	0
	0	0	0.0025526	0	0	0	0.01021	0	0.0083821	0.020842	0	0	0	0	0	0.095867	0	0.017599	0	0	0	0	0.0017374	0	0	0	0	0	0.00085501	0	0	0.0010819	0	0.00084188	0.002391	0	0	0	0	0	0.029178	0	0.074955	0	0	0	0	0	0
	0.0036605	0.010128	0	0	0	0.0010145	0	0	0	0	0.031934	0	0	0	0	0	0.074637	0	0.012698	0	0	0	0	0	0	0	0	0	0	0	0.00031319	0	0	0	0	0	0	0	0	0	0	0.025085	0	0.060186	0	0	0	0	0
	0	0	0	0	0	0	0	0	0	0	0	0.0076127	0.034196	0	0	0	0	0	0	0	0	0	0	0.11209	0.080928	0.059645	0	0.010403	0.001133	0.0011051	0.0065396	0.0016111	0.0077958	0	0	0	0.00089106	0.021141	0	0	0	0.0030376	0	0	0	0	0	0.00037631	0
	0	0	0	0	0	0	0.063251	0	0.0078661	0.041856	0	0	0	0	0	0	0	0	0	0	0.0011296	0	0.0015226	0.068468	0	0	0	0	0.0013982	0	0.00032554	0.0015166	0	0.0015678	0	0	0	0	0	0	0	0	0	0	0	0	0	0	0
	0.0030346	0	0	0.0023156	0	0.0017862	0	0	0	0	0	0	0	0	0	0	0	0	0	0	0	0.0080216	0	0.06078	0	0.0058461	0	0	0.0011181	0	0.0010277	0	0.0019755	0	0	0	0	0	0	0	0	0	0	0	0	0	0	0	0
	0	0	0	0	0.0018046	0	0.022477	0	0	0.10834	0	0	0.0027647	0	0	0	0	0	0	0	0.0038893	0	0.0033189	0.030921	0	0.012755	0	0	0.0023528	0.00090868	0	0.0030375	0	0.0027842	0.015248	0	0	0	0	0	0	0	0	0	0	0	0	0	0
	0.006859	0.038422	0	0.0022405	0	0.0027824	0	0	0	0	0.11679	0.0020345	0	0	0	0	0.0069115	0	0.002375	0	0	0.012331	0	0.028917	0	0.020386	0	0	0.0030726	0	0.0016112	0	0.0023088	0	0	0.0053581	0	0	0	0	0	0	0	0.0016288	0.0016707	0	0	0	0
	0	0.127	0	0.0022639	0	0	0	0	0	0	0	0	0	0	0	0	0.053683	0	0.0052301	0	0	0.0024626	0	0	0	0	0	0	0	0	0	0	0.0024429	0	0	0	0	0	0	0	0	0	0	0	0	0	0	0	0
	0	0	0	0	0	0	0	0	0	0	0	0.027278	0	0	0	0	0	0	0	0	0	0	0	0.018941	0.0033256	0.023953	0.13487	0	0	0.024878	0	0.034036	0.004696	0.0073805	0	0	0	0	0	0	0	0	0	0	0	0	0	0.0072462	0.0053157
	0	0	0	0	0	0	0	0	0	0	0	0	0.047995	0	0	0	0	0	0	0	0	0	0	0	0.031971	0.0029358	0	0.14471	0	0.0028642	0.025116	0.0082498	0.024578	0.0059578	0	0	0	0.003635	0	0	0	0	0	0	0	0	0	0.0019086	0
	0	0	0.012852	0	0	0	0	0	0	0.004305	0	0	0	0.06096	0	0.0020323	0	0.0016426	0	0	0.030904	0	0.058671	0	0	0	0	0	0.0056004	0	0	0.01363	0	0.015808	0.013926	0	0	0	0	0	0	0	0.0017281	0	0	0.0043458	0	0.002484	0
	0	0	0	0.017079	0	0.019304	0	0	0	0	0.024362	0	0	0	0	0	0.0091308	0	0	0	0	0.089133	0	0	0	0	0	0	0	0	0	0	0.019376	0	0	0.049338	0	0	0	0	0	0	0	0	0.081842	0	0.010746	0	0.0053571
	0	0	0.038462	0	0	0	0.0030151	0.0044808	0.072808	0.0056031	0	0	0	0	0	0.021232	0	0.011095	0	0	0	0	0.075618	0	0	0	0	0	0	0	0	0.014794	0	0.082423	0.0058422	0	0	0	0	0	0	0	0.015541	0	0	0	0	0	0
	0.04899	0.017994	0	0.03089	0	0.0047402	0	0	0	0	0	0	0	0	0	0	0.0081535	0	0	0	0	0	0	0	0	0	0	0	0	0	0	0	0.022655	0	0	0	0	0	0	0	0	0	0	0	0	0	0	0	0
	0	0	0	0.032798	0	0.021595	0	0	0	0	0.0043719	0	0	0	0	0	0.0027011	0	0	0	0	0.075101	0	0	0	0	0	0	0	0	0.0037061	0	0.0073188	0	0	0	0	0	0	0	0	0	0	0	0.0091911	0	0	0	0
	0	0	0	0	0	0	0	0	0	0	0	0.067307	0.0051726	0	0.0023482	0	0	0	0	0	0	0	0	0.057388	0.0025537	0.016807	0.046987	0.002716	0	0.012513	0	0.0063107	0	0	0	0	0	0	0	0	0	0	0	0	0	0	0	0.0042583	0
	0	0	0	0	0	0	0	0	0	0	0	0.0043142	0.08817	0	0	0	0	0	0	0	0	0	0	0.0148	0.017796	0.0030453	0.0020658	0.03923	0	0	0.0059272	0	0.0029016	0	0	0	0	0	0	0	0	0	0	0	0	0	0	0.00093073	0
	0.024881	0.018726	0	0.013666	0	0	0	0	0	0	0	0	0	0	0	0	0	0	0	0	0	0	0	0	0	0	0	0	0	0	0	0	0	0	0	0	0	0	0	0	0	0	0	0	0	0	0	0	0
	0	0	0.015684	0	0	0	0.055328	0.0044687	0.061447	0.0081549	0	0	0	0	0	0.02987	0	0.0093664	0	0	0	0	0	0	0	0	0	0	0	0	0	0	0	0.012382	0.0077706	0	0	0	0	0	0	0	0.010714	0	0	0	0	0	0
	0.027	0	0	0.010589	0	0	0	0	0.011543	0	0	0	0	0	0	0	0	0	0	0	0	0	0	0	0.0033019	0	0	0	0	0	0	0	0.0952	0.04795	0	0	0	0	0	0	0	0	0	0	0	0	0	0	0
	0.015592	0	0.0033608	0	0	0	0	0	0.0293	0	0	0.0028597	0	0	0	0	0	0	0	0	0	0	0	0.0091454	0	0.003439	0	0	0	0	0	0.011117	0.030864	0.14592	0	0	0	0	0	0	0	0	0	0	0	0	0	0	0
	0.091201	0	0	0	0	0	0	0	0.0025422	0	0	0	0	0	0	0	0	0	0	0	0	0	0	0	0	0	0	0	0	0	0	0	0	0.003902	0	0	0	0	0	0	0	0	0	0	0	0	0	0	0
	0	0	0	0	0	0	0.077751	0	0	0	0	0	0	0	0	0.0040019	0	0.0020208	0	0	0	0	0	0	0	0	0	0	0	0	0	0	0	0	0.0050308	0	0	0	0	0	0	0	0	0	0	0	0	0	0
	0	0.012003	0	0	0	0	0	0	0	0	0	0	0	0	0	0	0.0056347	0	0	0	0	0.0027652	0	0	0	0	0	0	0	0	0	0	0.0027222	0	0	0	0	0	0	0	0	0	0	0	0	0	0	0	0
	0	0.026187	0	0	0	0	0	0	0	0	0	0	0	0	0	0	0.1046	0	0.010627	0	0	0	0	0	0	0	0	0	0	0	0	0	0	0	0	0	0	0	0	0	0	0	0	0	0	0	0	0	0
	0	0	0.016596	0	0.011224	0	0	0	0	0.011251	0	0	0	0.0078287	0	0.0027904	0	0.0012405	0	0	0.030082	0	0.048881	0	0	0	0	0	0.011354	0.0077595	0	0.028358	0	0.028385	0.027383	0	0	0	0	0	0	0	0	0	0	0	0	0.00042185	0
	0	0	0	0.013216	0	0.012033	0	0	0	0	0.020509	0	0	0	0	0	0.0097369	0	0	0	0	0.055412	0	0	0	0	0	0	0	0	0.010556	0	0.018297	0	0	0.027084	0	0	0	0	0	0	0	0	0.015447	0	0	0	0
	0	0	0	0	0	0	0	0	0	0	0	0	0	0	0	0	0	0	0	0	0	0	0	0.030105	0	0	0	0	0	0	0	0	0	0	0	0	0	0	0	0	0	0	0	0	0	0	0	0	0
	0	0	0	0	0	0	0	0	0	0	0	0	0	0	0	0	0	0	0	0	0	0	0	0.015174	0	0	0	0	0	0	0	0	0	0	0	0	0	0	0	0	0	0	0	0	0	0	0	0	0
	0	0	0	0	0.0017099	0	0	0	0.01027	0.015234	0	0	0	0	0	0	0	0	0	0	0	0	0.002767	0	0	0	0	0	0.0012356	0	0	0.0034011	0	0.0029349	0	0	0	0	0	0	0	0	0	0	0	0	0	0	0
	0	0.004595	0	0	0	0	0	0	0	0	0.0021191	0	0	0	0	0	0	0	0	0	0	0	0	0	0	0	0	0	0	0	0	0	0	0	0	0	0	0	0	0	0	0	0	0	0	0	0	0	0
	0	0	0	0	0	0	0.020786	0	0.015048	0.016224	0	0	0	0	0	0	0	0	0	0	0	0	0.0038884	0	0	0	0	0	0	0	0	0	0	0.0021573	0	0	0	0	0	0	0	0	0	0	0	0	0	0	0
	0.0090861	0.012561	0	0.0029474	0	0.0017845	0	0	0	0	0.0064771	0	0	0	0	0	0	0	0	0	0	0.0059115	0	0.016109	0	0	0	0	0	0	0.0017089	0	0.0028071	0	0	0	0	0	0	0	0	0	0	0	0	0	0	0	0
	0	0	0	0	0	0	0.027176	0	0	0.0029363	0	0	0	0	0	0	0	0	0	0	0	0	0	0	0	0	0	0	0	0	0	0	0	0	0.0040361	0	0	0	0	0	0	0	0	0	0	0	0	0	0
	0	0	0	0	0	0	0	0	0.012651	0	0	0	0	0	0	0	0	0	0	0	0	0	0	0	0	0	0	0	0.00051646	0	0	0	0	0	0	0	0	0	0	0	0	0	0	0	0	0	0	0	0
	0	0	0	0	0	0	0.008013	0	0.095199	0.014366	0	0	0	0	0	0	0	0	0	0	0	0	0	0	0	0	0	0	0	0	0	0	0	0	0	0	0	0	0	0	0	0	0	0	0	0	0	0	0
	0.12117	0.042842	0	0.025552	0	0	0	0	0	0	0.025678	0	0	0	0	0	0.0085328	0	0	0	0	0	0	0	0	0	0	0	0	0	0	0	0	0	0	0	0	0	0	0	0	0	0	0	0	0	0	0	0
	0	0	0.012274	0	0	0	0.018709	0	0.093094	0.017871	0	0	0	0	0	0.012434	0	0	0	0	0	0	0	0	0	0	0	0	0	0	0	0	0	0	0	0	0	0	0	0	0	0	0	0	0	0	0	0	0
	0.034767	0	0	0	0	0.001092	0	0	0	0	0	0	0	0	0	0	0	0	0	0	0	0	0	0.0067785	0	0	0	0	0	0	0.0006445	0	0.0016448	0	0	0	0	0	0	0	0	0	0	0	0	0	0	0	0
	0	0	0	0	0	0	0.053506	0.095156	0	0	0	0	0	0	0	0.032412	0	0.019305	0	0	0	0	0	0	0	0	0	0	0	0	0	0	0	0	0.060819	0	0	0	0	0	0	0	0	0	0	0	0	0	0
	0	0	0	0	0	0	0	0	0	0	0.017284	0	0	0	0	0	0.022043	0	0.017977	0	0	0.0022443	0	0	0	0	0	0	0	0	0	0	0.00091881	0	0	0.070377	0	0	0	0	0	0	0	0	0.00078345	0	0	0	0
	0	0	0	0	0	0	0	0	0	0.005869	0	0	0	0	0	0	0	0	0	0	0	0	0	0	0	0	0	0	0	0	0	0	0	0	0.079178	0	0	0	0	0	0	0	0	0	0	0	0	0	0
	0	0	0	0	0	0	0	0	0	0	0.0092692	0	0	0	0	0	0	0	0	0	0	0	0	0	0	0	0	0	0	0	0	0	0	0	0	0.047501	0	0	0	0	0	0	0	0	0	0	0	0	0
	0	0	0	0	0	0	0	0	0	0	0	0.0025612	0	0	0	0	0	0	0	0.0029022	0	0	0	0	0.0043172	0.057384	0	0	0.0011703	0	0	0	0	0	0	0	0.0032554	0	0	0.00054955	0	0	0.00182	0	0	0.0011813	0	0	0
	0	0	0	0	0	0.0016563	0	0	0	0	0	0	0.0066499	0	0	0	0	0	0	0	0	0	0	0	0.05459	0.0074655	0	0	0	0	0	0	0	0	0	0	0	0.0032453	0	0.0027185	0	0	0	0.00085886	0	0	0.0022723	0	0
	0	0	0	0	0	0	0	0	0	0	0	0	0	0	0	0	0	0.0028625	0	0.0031607	0	0	0	0	0	0	0	0	0.0017718	0	0	0	0	0	0.0033858	0	0	0	0	0	0.063633	0	0.0048143	0	0	0.0011067	0	0	0
	0	0	0	0	0	0	0	0	0	0	0	0	0	0	0	0	0	0	0	0	0	0	0	0	0	0	0	0	0	0	0	0	0	0	0	0	0	0	0	0	0	0.06762	0	0	0	0	0	0	0
	0	0.044313	0	0	0	0.0018623	0	0	0	0	0.10793	0	0	0	0	0	0.070583	0	0.0036833	0	0	0.0044514	0	0	0	0	0	0	0	0	0	0	0	0	0	0.011981	0	0	0	0	0	0.012925	0	0.0075633	0.0036871	0	0	0	0
	0	0	0	0	0.0014177	0.00064743	0	0	0	0	0	0	0	0.0019144	0	0	0	0.0036692	0	0	0.010156	0.00046154	0.0056476	0	0.0021768	0	0	0	0.0063399	0.0024236	0	0.0045223	0	0	0.006352	0	0	0	0.005058	0.0015864	0.0024098	0.0001295	0.0041633	0.00026672	0	0.0031719	0.00030798	0	0
	0	0	0	0	0	0.0031355	0	0	0	0	0	0	0	0	0	0	0	0	0.002286	0	0	0.0059722	0	0	0	0.0015745	0	0	0	0	0.0012591	0	0	0	0	0	0	0.001568	0	0.0042802	0	0	0	0.0021194	0	0	0.0016387	0	0
	0	0	0	0	0.00076858	0	0	0	0	0.0023041	0	0	0	0	0	0.016278	0	0.0029585	0	0	0.0067526	0	0.0040703	0	0	0	0	0	0.0044417	0	0	0	0	0	0.0043323	0	0	0	0	0	0.011692	0	0.0047104	0	0	0.001829	0	0	0
	0	0	0	0	0	0.0051769	0	0	0	0	0	0	0	0	0	0	0	0	0.0021473	0	0	0.0081965	0	0	0	0	0	0	0	0	0	0	0	0	0	0.0032124	0	0.00090053	0	0.0050596	0	0.0072788	0	0.0035656	0.0018575	0	0.0023344	0	0
	0	0	0	0	0	0	0	0	0	0	0	0	0	0	0	0	0.022343	0	0.0021109	0	0	0	0	0	0	0	0	0	0	0	0	0	0	0	0	0	0	0	0	0	0	0.020093	0	0.0043336	0	0	0	0	0
	0	0	0	0	0	0.00064124	0	0	0	0	0	0	0	0.0021908	0.00033379	0	0	0.0055055	0	0	0.017667	0.0010951	0.00892	0	0	0	0	0	0.010132	0.0030707	0	0	0	0	0.0057438	0	0	0	0.0079523	0.00096971	0.0070761	0	0.0081106	0.00023362	0	0.0081083	0.00070243	0.0032898	0
	0	0	0	0	0	0.009823	0	0	0	0	0	0	0	0	0.0026096	0	0	0	0.0036549	0	0	0.010378	0	0	0	0	0	0	0	0	0	0	0	0	0	0.006208	0	0	0	0.014884	0	0.0035285	0	0.0055531	0.0032577	0	0.0040061	0	0
	0	0	0	0	0	0	0	0	0	0	0	0.029133	0	0	0	0	0	0.0019912	0	0.029195	0	0	0	0	0	0.018994	0	0	0	0	0	0	0	0	0	0	0.006305	0	0	0	0.020376	0	0.0028143	0	0	0.0013188	0	0	0
	0	0	0	0	0	0.00093253	0	0	0	0	0	0	0.046455	0	0	0	0	0	0	0	0	0	0	0	0.027898	0	0	0	0	0	0	0	0	0	0	0	0	0.0033786	0	0.0032572	0	0.0070763	0	0	0	0	0.00077064	0	0
	0	0	0	0	0	0.0013432	0	0	0	0	0	0	0.076929	0	0	0	0	0	0	0	0	0	0	0.001109	0.016121	0	0	0	0	0	0	0	0	0	0	0	0	0.25771	0	0	0	0.068747	0	0.0036531	0	0	0	0	0
	0	0	0	0	0	0.00041778	0	0	0	0	0	0	0	0	0	0	0	0.0012546	0	0	0.0055682	0.00081056	0	0	0.001408	0.0092692	0	0	0.0034215	0	0	0	0	0	0.0012816	0	0	0	0	0.00075139	0	0	0.0033507	0	0	0.0037774	0	0	0
	0	0	0	0	0	0.0024886	0	0	0	0	0	0	0.0027049	0	0	0	0	0	0.00089513	0	0	0.0046778	0	0	0.011725	0.00087514	0	0	0	0	0	0	0	0	0	0	0	0	0	0.0043969	0	0	0	0.0019737	0	0	0.0016807	0	0
	0	0	0.0028913	0	0.0012407	0.00094129	0	0	0	0.051966	0	0.0026462	0.0015425	0	0	0	0	0.0040508	0	0.0076794	0.0065695	0.0010227	0.0053132	0	0.0087474	0.093574	0	0	0.0041916	0.0018898	0	0.0035993	0	0.0023022	0.016577	0	0.0073499	0	0.0017328	0.0025319	0.0034506	0	0.0018487	0	0	0.001391	0	0	0
	0	0	0	0	0	0.0034283	0	0	0	0	0.047143	0	0.0057304	0	0	0	0	0	0.0028887	0	0	0.0062749	0	0	0.055333	0.024584	0	0	0.00036165	0	0.0011815	0	0	0	0	0.0098524	0	0.010251	0	0.0031889	0	0.013259	0	0.0032445	0.0019916	0	0.0016717	0	0
[truncated: 65 more columns]

## Sheet: Sheet2
Fig 1A
Fiber lengths
	0	99.971	0	22.037	0	70.275	0	0	102.49	0	107.04	0	0	0	0	0	120.01	0	0	0	0	0	0	0	0	0	0	0	0	0	0	0	24.962	103.73	0	0	0	0	0	0	0	0	0	0	0	0	0	0	0
	99.971	0	0	120.16	0	0	0	0	0	0	7.4234	0	0	0	0	0	53.425	0	0	0	0	0	0	0	0	0	0	0	0	0	0	0	0	0	0	0	0	0	0	0	0	0	0	0	0	0	0	0	0
	0	0	0	101.93	19.516	0	0	0	22.38	0	0	0	0	0	0	141.14	0	0	0	0	0	0	34.917	0	0	0	0	0	52.897	0	0	18.256	104.16	29.254	0	0	0	0	0	0	0	0	0	0	0	0	0	0	0
	22.037	120.16	101.93	0	104.02	24.869	0	0	0	0	0	0	0	0	0	0	0	0	0	0	0	0	0	0	0	0	0	0	0	0	11.354	104.41	26.632	104.75	0	0	0	0	0	0	0	0	0	0	0	0	0	0	0
	0	0	19.516	104.02	0	107.3	0	0	58.488	161.87	0	0	0	0	0	0	0	0	0	0	0	0	17.54	0	0	0	0	0	16.743	8.8699	106.12	15.511	109.67	59.501	0	0	0	0	0	0	0	0	0	0	0	0	0	0	0
	70.275	0	0	24.869	107.3	0	0	0	0	0	167.64	0	0	0	0	0	0	0	122.54	0	0	9.6995	0	0	0	212.9	0	0	124.09	111.82	7.9752	112.33	0	0	0	110.01	0	0	114.26	5.0012	0	171.91	0	0	49.779	157.29	8.9304	114.89	0
	0	0	0	0	0	0	0	32.346	90.801	11.73	0	0	0	0	0	57.483	0	75.473	0	0	0	0	0	0	0	0	0	0	0	0	0	0	0	0	65.227	0	0	0	0	0	0	0	97.926	0	0	0	0	0	0
	0	0	0	0	0	0	32.346	0	0	28.073	0	0	0	0	0	9.3217	0	40.446	0	0	0	0	0	0	0	0	0	0	0	0	0	0	0	0	14.584	0	0	0	0	0	0	0	0	0	0	0	0	0	0
	102.49	0	22.38	0	58.488	0	90.801	0	0	101.79	0	0	0	0	0	118.91	0	0	0	0	0	0	0	0	0	0	0	0	0	0	0	0	103.93	23.038	0	0	0	0	0	0	0	0	0	0	0	0	0	0	0
	0	0	0	0	161.87	0	11.73	28.073	101.79	0	0	0	0	0	0	53.651	0	0	0	0	161.13	0	161.03	0	0	0	0	0	163.07	0	0	171.28	0	164.75	94.814	0	0	0	0	0	0	0	0	0	0	157.49	0	0	0
	107.04	7.4234	0	0	0	167.64	0	0	0	0	0	0	0	0	0	0	50.98	0	101.85	0	0	153.79	0	0	0	0	0	0	0	0	171.17	0	155.88	0	0	93.664	0	0	0	0	0	89.499	0	99.966	137.19	0	0	0	0
	0	0	0	0	0	0	0	0	0	0	0	0	12.331	0	0	0	0	0	0	12.442	0	0	0	11.394	34.393	16.027	94.765	0	0	121.18	0	111.53	0	113.27	0	0	41.464	0	0	0	0	0	0	0	0	0	0	122.56	0
	0	0	0	0	0	0	0	0	0	0	0	12.331	0	0	0	0	0	0	0	0	0	0	0	67.733	12.377	52.698	0	88.572	0	0	113.75	0	103.27	0	0	0	0	42.162	0	0	0	58.884	0	0	0	0	0	153.62	0
	0	0	0	0	0	0	0	0	0	0	0	0	0	0	0	0	0	0	0	0	10.815	0	10.038	0	0	0	0	0	52.059	0	0	0	0	0	54.339	0	0	0	0	0	0	0	0	0	0	19.376	0	19.362	0
	0	0	0	0	0	0	0	0	0	0	0	0	0	0	0	0	0	0	103.28	0	0	109.64	0	0	0	179.17	51.34	11.543	103.76	90.393	9.6041	0	0	0	0	89.078	0	0	97.584	3.2189	0	0	0	0	42.706	92.894	3.1677	82.781	5.5838
	0	0	141.14	0	0	0	57.483	9.3217	118.91	53.651	0	0	0	0	0	0	0	12.751	0	0	0	0	0	0	0	0	0	0	0	0	0	0	0	0	18.665	0	0	0	0	0	0	0	45.227	0	0	0	0	0	0
	120.01	53.425	0	0	0	0	0	0	0	0	50.98	0	0	0	0	0	0	0	12.248	0	0	0	0	0	0	0	0	0	0	0	177.86	0	169.54	0	0	0	0	0	0	0	0	0	0	45.974	0	0	0	0	0
	0	0	0	0	0	0	75.473	40.446	0	0	0	0	0	0	0	12.751	0	0	0	0	0	0	0	0	0	0	0	0	0	0	0	0	0	0	9.9064	0	0	0	0	0	0	0	9.7631	0	0	103.66	0	0	0
	0	0	0	0	0	122.54	0	0	0	0	101.85	0	0	0	103.28	0	12.248	0	0	0	0	0	0	0	0	0	0	0	0	0	0	0	0	0	0	7.8871	0	0	0	117.05	0	0	0	11.045	0	0	98.375	0	0
	0	0	0	0	0	0	0	0	0	0	0	12.442	0	0	0	0	0	0	0	0	0	0	188.82	0	0	61.333	0	0	0	0	0	0	0	0	0	0	10.277	0	0	0	12.611	0	0	0	0	0	0	0	0
	0	0	0	0	0	0	0	0	0	161.13	0	0	0	10.815	0	0	0	0	0	0	0	0	8.8648	0	0	0	0	0	11.128	56.858	0	0	0	0	91.022	0	0	0	0	0	178.62	0	0	0	0	9.1279	0	0	0
	0	0	0	0	0	9.6995	0	0	0	0	153.79	0	0	0	109.64	0	0	0	0	0	0	0	0	0	0	0	0	0	0	0	0	0	0	0	0	0	0	0	0	0	0	0	0	0	6.8419	0	8.1004	0	0
	0	0	34.917	0	17.54	0	0	0	0	161.03	0	0	0	10.038	0	0	0	0	0	188.82	8.8648	0	0	0	0	0	0	0	19.644	68.022	0	68.945	0	86.055	0	0	0	0	0	0	186.07	0	0	0	0	0	0	0	0
	0	0	0	0	0	0	0	0	0	0	0	11.394	67.733	0	0	0	0	0	0	0	0	0	0	0	74.446	12.516	99.663	0	0	115.59	164.47	99.991	0	95.684	0	0	0	148.08	0	0	0	0	0	0	0	0	0	0	0
	0	0	0	0	0	0	0	0	0	0	0	34.393	12.377	0	0	0	0	0	0	0	0	0	0	74.446	0	25.09	128.35	108.22	0	142.23	125.19	135.01	115.02	0	0	0	0	83.629	0	0	0	95.967	0	0	0	0	0	167.54	0
	0	0	0	0	0	212.9	0	0	0	0	0	16.027	52.698	0	179.17	0	0	0	0	61.333	0	0	0	12.516	25.09	0	114.13	118.6	0	135.03	159.29	121.89	139.4	120.84	0	0	88.683	129.73	0	202.58	98.149	0	0	0	0	0	0	141.81	169.09
	0	0	0	0	0	0	0	0	0	0	0	94.765	0	0	51.34	0	0	0	0	0	0	0	0	99.663	128.35	114.13	0	10.319	0	14.65	46.584	0	0	0	0	0	0	0	0	0	0	0	0	0	0	0	0	9.494	39.584
	0	0	0	0	0	0	0	0	0	0	0	0	88.572	0	11.543	0	0	0	0	0	0	0	0	0	108.22	118.6	10.319	0	0	49.97	16.968	79.056	0	0	0	0	0	0	65.464	0	0	0	0	0	0	0	0	52.072	7.3595
	0	0	52.897	0	16.743	124.09	0	0	0	163.07	0	0	0	52.059	103.76	0	0	0	0	0	11.128	0	19.644	0	0	0	0	0	0	8.8364	108.34	0	118.78	0	117.63	0	182.21	0	4.6308	116.1	177.88	0	194.15	0	0	5.2129	154	0	0
	0	0	0	0	8.8699	111.82	0	0	0	0	0	121.18	0	0	90.393	0	0	0	0	0	56.858	0	68.022	115.59	142.23	135.03	14.65	49.97	8.8364	0	92.211	11.478	86.01	0	0	0	185.54	0	9.7665	109.55	202.56	0	0	0	0	0	0	9.582	0
	0	0	0	11.354	106.12	7.9752	0	0	0	0	171.17	0	113.75	0	9.6041	0	177.86	0	0	0	0	0	0	164.47	125.19	159.29	46.584	16.968	108.34	92.211	0	95.707	13.93	102.48	0	0	0	0	106.97	13.607	0	0	0	0	0	0	0	95.959	0
	0	0	18.256	104.41	15.511	112.33	0	0	0	171.28	0	111.53	0	0	0	0	0	0	0	0	0	0	68.945	99.991	135.01	121.89	0	79.056	0	11.478	95.707	0	88.111	9.3022	0	0	0	0	0	122.44	192.31	0	216.42	0	0	0	0	0	0
	24.962	0	104.16	26.632	109.67	0	0	0	103.93	0	155.88	0	103.27	0	0	0	169.54	0	0	0	0	0	0	0	115.02	139.4	0	0	118.78	86.01	13.93	88.111	0	93.755	0	0	0	0	0	0	0	0	0	197.08	0	0	0	0	0
	103.73	0	29.254	104.75	59.501	0	0	0	23.038	164.75	0	113.27	0	0	0	0	0	0	0	0	0	0	86.055	95.684	0	120.84	0	0	0	0	102.48	9.3022	93.755	0	0	0	0	0	0	0	0	0	0	0	0	0	0	0	0
	0	0	0	0	0	0	65.227	14.584	0	94.814	0	0	0	54.339	0	18.665	0	9.9064	0	0	91.022	0	0	0	0	0	0	0	117.63	0	0	0	0	0	0	0	0	0	0	176.51	121.88	0	0	0	0	89.965	0	81.049	0
	0	0	0	0	0	110.01	0	0	0	0	93.664	0	0	0	89.078	0	0	0	7.8871	0	0	0	0	0	0	0	0	0	0	0	0	0	0	0	0	0	0	0	0	105.56	0	0	0	0	44.756	0	84.288	0	66.994
	0	0	0	0	0	0	0	0	0	0	0	41.464	0	0	0	0	0	0	0	10.277	0	0	0	0	0	88.683	0	0	182.21	185.54	0	0	0	0	0	0	0	0	0	0	10.895	0	0	0	0	0	0	0	0
	0	0	0	0	0	0	0	0	0	0	0	0	42.162	0	0	0	0	0	0	0	0	0	0	148.08	83.629	129.73	0	0	0	0	0	0	0	0	0	0	0	0	0	0	0	5.5143	0	0	0	0	0	0	0
	0	0	0	0	0	114.26	0	0	0	0	0	0	0	0	97.584	0	0	0	0	0	0	0	0	0	0	0	0	65.464	4.6308	9.7665	106.97	0	0	0	0	0	0	0	0	109.23	186.09	0	0	0	0	4.4073	0	3.163	84.764
	0	0	0	0	0	5.0012	0	0	0	0	0	0	0	0	3.2189	0	0	0	117.05	0	0	0	0	0	0	202.58	0	0	116.1	109.55	13.607	122.44	0	0	176.51	105.56	0	0	109.23	0	0	0	0	0	53.982	116.03	6.0123	100.62	0
	0	0	0	0	0	0	0	0	0	0	0	0	0	0	0	0	0	0	0	12.611	178.62	0	186.07	0	0	98.149	0	0	177.88	202.56	0	192.31	0	0	121.88	0	10.895	0	186.09	0	0	0	7.9761	0	0	0	0	0	0
	0	0	0	0	0	171.91	0	0	0	0	89.499	0	58.884	0	0	0	0	0	0	0	0	0	0	0	95.967	0	0	0	0	0	0	0	0	0	0	0	0	5.5143	0	0	0	0	0	6.6329	0	0	0	0	0
	0	0	0	0	0	0	97.926	0	0	0	0	0	0	0	0	45.227	0	9.7631	0	0	0	0	0	0	0	0	0	0	194.15	0	0	216.42	0	0	0	0	0	0	0	0	7.9761	0	0	0	0	0	0	0	0
	0	0	0	0	0	0	0	0	0	0	99.966	0	0	0	0	0	45.974	0	11.045	0	0	0	0	0	0	0	0	0	0	0	0	0	197.08	0	0	0	0	0	0	0	0	6.6329	0	0	0	0	0	0	0
	0	0	0	0	0	49.779	0	0	0	0	137.19	0	0	0	42.706	0	0	0	0	0	0	6.8419	0	0	0	0	0	0	0	0	0	0	0	0	0	44.756	0	0	0	53.982	0	0	0	0	0	0	13.687	67.723	11.157
	0	0	0	0	0	157.29	0	0	0	157.49	0	0	0	19.376	92.894	0	0	103.66	0	0	9.1279	0	0	0	0	0	0	0	5.2129	0	0	0	0	0	89.965	0	0	0	4.4073	116.03	0	0	0	0	0	0	0	2.485	74.191
	0	0	0	0	0	8.9304	0	0	0	0	0	0	0	0	3.1677	0	0	0	98.375	0	0	8.1004	0	0	0	0	0	0	154	0	0	0	0	0	0	84.288	0	0	0	6.0123	0	0	0	0	13.687	0	0	91.273	5.0682
	0	0	0	0	0	114.89	0	0	0	0	0	122.56	153.62	19.362	82.781	0	0	0	0	0	0	0	0	0	167.54	141.81	9.494	52.072	0	9.582	95.959	0	0	0	81.049	0	0	0	3.163	100.62	0	0	0	0	67.723	2.485	91.273	0	66.79
	0	0	0	0	0	0	0	0	0	0	0	0	0	0	5.5838	0	0	0	0	0	0	0	0	0	0	169.09	39.584	7.3595	0	0	0	0	0	0	0	66.994	0	0	84.764	0	0	0	0	0	11.157	74.191	5.0682	66.79	0
	0	0	0	0	0	0	0	0	0	0	0	78.261	0	54.788	119.51	0	0	7.2381	0	44.856	0	0	171.49	0	0	120.8	0	0	153.38	0	0	0	0	0	4.7586	0	4.3927	0	0	0	16.144	0	9.7336	0	0	92.384	0	76.973	0
	0	0	0	0	0	118.4	0	0	0	0	130.74	0	0	0	91.888	0	0	0	6.677	0	0	0	0	0	106.43	183.48	0	77.955	0	0	162.8	0	0	0	146.79	3.8732	0	3.1456	0	109.09	0	10.409	0	7.9419	50.44	0	90.949	116.06	68.127
	0	0	0	0	171.85	0	26.595	14.65	0	10.447	0	0	0	0	0	24.414	0	107.56	0	0	161.02	0	164.15	0	0	0	0	0	166.65	172.79	0	172.45	0	0	98.97	0	0	0	0	0	86.986	0	106.71	0	0	159.13	0	0	0
	0	0	141.64	0	0	0	74.329	0	121.08	65.707	0	0	0	0	0	7.9764	0	12.439	0	0	0	0	170.82	0	0	0	0	0	179.08	0	0	189.65	0	176.84	111.23	0	0	0	0	0	30.325	0	18.562	0	0	0	0	0	0
	127.24	70.148	0	0	0	171.04	0	0	0	0	62.297	0	0	0	0	0	11.692	0	10.318	0	0	0	0	0	0	0	0	0	0	0	187.79	0	0	0	0	0	0	0	0	0	0	24.526	0	21.653	0	0	0	0	0
	0	0	0	0	0	0	0	0	0	0	0	63.047	27.242	0	0	0	0	0	0	0	0	0	0	96.405	8.3541	80.522	0	105.95	217.4	155.17	123.91	135.98	109.67	0	0	0	137.86	100.48	0	0	0	112.81	0	0	0	0	0	175.52	0
	0	0	0	0	0	0	34.229	0	84.383	59.494	0	0	0	0	0	0	0	0	0	0	154.2	0	150.77	3.0407	0	0	0	0	155.27	0	212.98	162.87	0	157.02	0	0	0	0	0	0	0	0	0	0	0	0	0	0	0
	89.227	0	0	135.37	0	155.19	0	0	0	0	0	0	0	0	0	0	0	0	0	0	0	148.2	0	119.38	0	115.75	0	0	209.28	0	165.28	0	150.76	0	0	0	0	0	0	0	0	0	0	0	0	0	0	0	0
	0	0	0	0	159.58	0	26.422	0	0	35.071	0	0	73.556	0	0	0	0	0	0	0	158.14	0	159.26	7.8272	0	8.4361	0	0	165.33	169.22	0	167.49	0	164.67	94.94	0	0	0	0	0	0	0	0	0	0	0	0	0	0
	102.24	23.536	0	150.16	0	167.49	0	0	0	0	37.519	70.552	0	0	0	0	93.648	0	110.7	0	0	153.3	0	117.55	0	118.81	0	0	219.23	0	169.83	0	162.65	0	0	97.28	0	0	0	0	0	0	0	127.62	138.25	0	0	0	0
	0	19.057	0	129.05	0	0	0	0	0	0	0	0	0	0	0	0	60.141	0	78.849	0	0	134.53	0	0	0	0	0	0	0	0	0	0	138.1	0	0	0	0	0	0	0	0	0	0	0	0	0	0	0	0
	0	0	0	0	0	0	0	0	0	0	0	56.425	0	0	0	0	0	0	0	0	0	0	0	67.763	91.004	81.144	13.831	0	0	35.481	0	14.269	52.116	29.526	0	0	0	0	0	0	0	0	0	0	0	0	0	53.966	71.721
	0	0	0	0	0	0	0	0	0	0	0	0	55.536	0	0	0	0	0	0	0	0	0	0	0	79.213	94.722	0	8.9997	0	52.982	24.325	47.703	21.349	54.36	0	0	0	127.96	0	0	0	0	0	0	0	0	0	78.598	0
	0	0	63.718	0	0	0	0	0	0	107.61	0	0	0	18.446	0	109.95	0	104.35	0	0	50.105	0	35.456	0	0	0	0	0	63.396	0	0	69.994	0	70.823	34.928	0	0	0	0	0	0	0	137.21	0	0	46.191	0	37.543	0
	0	0	0	75.229	0	79.916	0	0	0	0	89.634	0	0	0	0	0	99.2	0	0	0	0	52.641	0	0	0	0	0	0	0	0	0	0	72.35	0	0	13.676	0	0	0	0	0	0	0	0	21.142	0	56.682	0	36.374
	0	0	19.69	0	0	0	101.28	113.85	37.287	130.4	0	0	0	0	0	118.65	0	126.91	0	0	0	0	13.568	0	0	0	0	0	0	0	0	71.944	0	69.461	67.284	0	0	0	0	0	0	0	148.23	0	0	0	0	0	0
	34.468	104.96	0	20.904	0	64.886	0	0	0	0	0	0	0	0	0	0	128.56	0	0	0	0	0	0	0	0	0	0	0	0	0	0	0	68.975	0	0	0	0	0	0	0	0	0	0	0	0	0	0	0	0
	0	0	0	19.356	0	21.709	0	0	0	0	150.96	0	0	0	0	0	155.19	0	0	0	0	7.8398	0	0	0	0	0	0	0	0	65.708	0	68.648	0	0	0	0	0	0	0	0	0	0	0	6.7804	0	0	0	0
	0	0	0	0	0	0	0	0	0	0	0	15.953	17.079	0	124.43	0	0	0	0	0	0	0	0	20.262	56.008	47.512	56.968	80.777	0	87.489	0	68.182	0	0	0	0	0	0	0	0	0	0	0	0	0	0	0	85.285	0
	0	0	0	0	0	0	0	0	0	0	0	20.498	15.099	0	0	0	0	0	0	0	0	0	0	58.762	44.983	60.228	72.779	54.454	0	0	81.787	0	64.862	0	0	0	0	0	0	0	0	0	0	0	0	0	0	114.23	0
	19.32	86.639	0	56.95	0	0	0	0	0	0	0	0	0	0	0	0	0	0	0	0	0	0	0	0	0	0	0	0	0	0	0	0	0	0	0	0	0	0	0	0	0	0	0	0	0	0	0	0	0
	0	0	57.243	0	0	0	73.616	101.73	27.97	96.821	0	0	0	0	0	105.94	0	119.03	0	0	0	0	0	0	0	0	0	0	0	0	0	0	0	72.822	20.321	0	0	0	0	0	0	0	134.75	0	0	0	0	0	0
	35.174	0	0	59.627	0	0	0	0	102.75	0	0	0	0	0	0	0	0	0	0	0	0	0	0	0	92.935	0	0	0	0	0	0	0	8.684	90.961	0	0	0	0	0	0	0	0	0	0	0	0	0	0	0
	104.52	0	72.501	0	0	0	0	0	33.733	0	0	96.694	0	0	0	0	0	0	0	0	0	0	0	76.878	0	102.87	0	0	0	0	0	19.096	98.365	6.3875	0	0	0	0	0	0	0	0	0	0	0	0	0	0	0
	25.607	0	0	0	0	0	0	0	104.13	0	0	0	0	0	0	0	0	0	0	0	0	0	0	0	0	0	0	0	0	0	0	0	0	104.27	0	0	0	0	0	0	0	0	0	0	0	0	0	0	0
	0	0	0	0	0	0	10.562	0	0	0	0	0	0	0	0	75.819	0	87.653	0	0	0	0	0	0	0	0	0	0	0	0	0	0	0	0	45.446	0	0	0	0	0	0	0	0	0	0	0	0	0	0
	0	45.658	0	0	0	0	0	0	0	0	0	0	0	0	0	0	75.11	0	0	0	0	121.74	0	0	0	0	0	0	0	0	0	0	131.57	0	0	0	0	0	0	0	0	0	0	0	0	0	0	0	0
	0	19.42	0	0	0	0	0	0	0	0	0	0	0	0	0	0	10.793	0	42.527	0	0	0	0	0	0	0	0	0	0	0	0	0	0	0	0	0	0	0	0	0	0	0	0	0	0	0	0	0	0
	0	0	77.196	0	80.65	0	0	0	0	91.961	0	0	0	53.452	0	100.26	0	112.84	0	0	73.32	0	69.958	0	0	0	0	0	85.059	90.596	0	81.667	0	76.23	12.846	0	0	0	0	0	0	0	0	0	0	0	0	127.66	0
	0	0	0	75.606	0	87.31	0	0	0	0	83.085	0	0	0	0	0	96.076	0	0	0	0	69.671	0	0	0	0	0	0	0	0	90.751	0	75.057	0	0	11.628	0	0	0	0	0	0	0	0	51.668	0	0	0	0
	0	0	0	0	0	0	0	0	0	0	0	0	0	0	0	0	0	0	0	0	0	0	0	11.068	0	0	0	0	0	0	0	0	0	0	0	0	0	0	0	0	0	0	0	0	0	0	0	0	0
	0	0	0	0	0	0	0	0	0	0	0	0	0	0	0	0	0	0	0	0	0	0	0	104.86	0	0	0	0	0	0	0	0	0	0	0	0	0	0	0	0	0	0	0	0	0	0	0	0	0
	0	0	0	0	147.91	0	0	0	76.439	74.801	0	0	0	0	0	0	0	0	0	0	0	0	146.73	0	0	0	0	0	151.94	0	0	157.19	0	149.65	0	0	0	0	0	0	0	0	0	0	0	0	0	0	0
	0	79.999	0	0	0	0	0	0	0	0	89.55	0	0	0	0	0	0	0	0	0	0	0	0	0	0	0	0	0	0	0	0	0	0	0	0	0	0	0	0	0	0	0	0	0	0	0	0	0	0
	0	0	0	0	0	0	28.893	0	71.446	74.634	0	0	0	0	0	0	0	0	0	0	0	0	139.05	0	0	0	0	0	0	0	0	0	0	147.86	0	0	0	0	0	0	0	0	0	0	0	0	0	0	0
	74.083	66.762	0	125.25	0	148.51	0	0	0	0	76.296	0	0	0	0	0	0	0	0	0	0	140.52	0	123.07	0	0	0	0	0	0	155.62	0	142.01	0	0	0	0	0	0	0	0	0	0	0	0	0	0	0	0
	0	0	0	0	0	0	47.364	0	0	84.087	0	0	0	0	0	0	0	0	0	0	0	0	0	0	0	0	0	0	0	0	0	0	0	0	11.45	0	0	0	0	0	0	0	0	0	0	0	0	0	0
	0	0	0	0	0	0	0	0	24.851	0	0	0	0	0	0	0	0	0	0	0	0	0	0	0	0	0	0	0	147.94	0	0	0	0	0	0	0	0	0	0	0	0	0	0	0	0	0	0	0	0
	0	0	0	0	0	0	75.031	0	46.838	83.748	0	0	0	0	0	0	0	0	0	0	0	0	0	0	0	0	0	0	0	0	0	0	0	0	0	0	0	0	0	0	0	0	0	0	0	0	0	0	0
	28.554	81.861	0	64.681	0	0	0	0	0	0	89.004	0	0	0	0	0	102.27	0	0	0	0	0	0	0	0	0	0	0	0	0	0	0	0	0	0	0	0	0	0	0	0	0	0	0	0	0	0	0	0
	0	0	63.422	0	0	0	75.948	0	24.074	85.818	0	0	0	0	0	105.35	0	0	0	0	0	0	0	0	0	0	0	0	0	0	0	0	0	0	0	0	0	0	0	0	0	0	0	0	0	0	0	0	0
	39.495	0	0	0	0	138.03	0	0	0	0	0	0	0	0	0	0	0	0	0	0	0	0	0	120.08	0	0	0	0	0	0	148.72	0	113.68	0	0	0	0	0	0	0	0	0	0	0	0	0	0	0	0
	0	0	0	0	0	0	12.966	6.6241	0	0	0	0	0	0	0	32.66	0	56.182	0	0	0	0	0	0	0	0	0	0	0	0	0	0	0	0	14.931	0	0	0	0	0	0	0	0	0	0	0	0	0	0
	0	0	0	0	0	0	0	0	0	0	90.38	0	0	0	0	0	15.323	0	16.401	0	0	141.46	0	0	0	0	0	0	0	0	0	0	148.76	0	0	9.4613	0	0	0	0	0	0	0	0	118.2	0	0	0	0
	0	0	0	0	0	0	0	0	0	83.156	0	0	0	0	0	0	0	0	0	0	0	0	0	0	0	0	0	0	0	0	0	0	0	0	5.8559	0	0	0	0	0	0	0	0	0	0	0	0	0	0
	0	0	0	0	0	0	0	0	0	0	77.877	0	0	0	0	0	0	0	0	0	0	0	0	0	0	0	0	0	0	0	0	0	0	0	0	9.3517	0	0	0	0	0	0	0	0	0	0	0	0	0
	0	0	0	0	0	0	0	0	0	0	0	33.299	0	0	0	0	0	0	0	71.648	0	0	0	0	105.93	5.8765	0	0	178.73	0	0	0	0	0	0	0	99.271	0	0	230.57	0	0	125.5	0	0	174.84	0	0	0
	0	0	0	0	0	184.45	0	0	0	0	0	0	36.789	0	0	0	0	0	0	0	0	0	0	0	5.5693	70.571	0	0	0	0	0	0	0	0	0	0	0	92.815	0	186.31	0	0	0	126.14	0	0	190.03	0	0
	0	0	0	0	0	0	0	0	0	0	0	0	0	0	0	0	0	109.93	0	43.985	0	0	0	0	0	0	0	0	166.08	0	0	0	0	0	113.66	0	0	0	0	0	19.404	0	63.021	0	0	155.87	0	0	0
	0	0	0	0	0	0	0	0	0	0	0	0	0	0	0	0	0	0	0	0	0	0	0	0	0	0	0	0	0	0	0	0	0	0	0	0	0	0	0	0	0	15.84	0	0	0	0	0	0	0
	0	16.992	0	0	0	162.92	0	0	0	0	11.369	0	0	0	0	0	17.482	0	107.43	0	0	157.18	0	0	0	0	0	0	0	0	0	0	0	0	0	94.847	0	0	0	0	0	80.926	0	102.35	136.17	0	0	0	0
	0	0	0	0	181.44	255.5	0	0	0	0	0	0	0	164.33	0	0	0	123.42	0	0	172.3	247.17	173.81	0	132.98	0	0	0	175.85	182.67	0	183.34	0	0	112.92	0	0	0	191.91	255.64	105.74	230.75	119.22	209.13	0	169.24	236.89	0	0
	0	0	0	0	0	177.62	0	0	0	0	0	0	0	0	0	0	0	0	125.62	0	0	167.53	0	0	0	134.96	0	0	0	0	183.79	0	0	0	0	0	0	126.29	0	179.5	0	0	0	122.88	0	0	169.47	0	0
	0	0	0	0	175.91	0	0	0	0	57.124	0	0	0	0	0	12.427	0	114.86	0	0	166.54	0	168.19	0	0	0	0	0	171.17	0	0	0	0	0	110.28	0	0	0	0	0	69.483	0	103.03	0	0	163.47	0	0	0
	0	0	0	0	0	172.33	0	0	0	0	0	0	0	0	0	0	0	0	120.08	0	0	164.86	0	0	0	0	0	0	0	0	0	0	0	0	0	114.09	0	121.6	0	174.37	0	70.425	0	115.2	145.15	0	165.22	0	0
	0	0	0	0	0	0	0	0	0	0	0	0	0	0	0	0	6.2758	0	112.7	0	0	0	0	0	0	0	0	0	0	0	0	0	0	0	0	0	0	0	0	0	0	60.378	0	91.055	0	0	0	0	0
	0	0	0	0	0	197.15	0	0	0	0	0	0	0	156.97	188.06	0	0	115.47	0	0	165.83	180.5	170.2	0	0	0	0	0	169.91	176.11	0	0	0	0	122.12	0	0	0	175.72	186.08	51.676	0	107.96	165.7	0	161.58	178.18	155.02	0
	0	0	0	0	0	169.78	0	0	0	0	0	0	0	0	168.36	0	0	0	118.44	0	0	162.56	0	0	0	0	0	0	0	0	0	0	0	0	0	117.01	0	0	0	171.36	0	84.505	0	113.61	144.14	0	162.45	0	0
	0	0	0	0	0	0	0	0	0	0	0	3.8056	0	0	0	0	0	87.499	0	8.8299	0	0	0	0	0	7.3654	0	0	0	0	0	0	0	0	0	0	53.54	0	0	0	11.206	0	77.95	0	0	139.65	0	0	0
	0	0	0	0	0	143.65	0	0	0	0	0	0	2.3165	0	0	0	0	0	0	0	0	0	0	0	10.004	0	0	0	0	0	0	0	0	0	0	0	0	57.388	0	145.77	0	12.27	0	0	0	0	134.86	0	0
	0	0	0	0	0	152.68	0	0	0	0	0	0	11.21	0	0	0	0	0	0	0	0	0	0	121.35	53.041	0	0	0	0	0	0	0	0	0	0	0	0	10.744	0	0	0	11.893	0	62.854	0	0	0	0	0
	0	0	0	0	0	229.22	0	0	0	0	0	0	0	0	0	0	0	117.19	0	0	162.92	238.01	0	0	110.21	5.4118	0	0	169.15	0	0	0	0	0	125.21	0	0	0	0	229.79	0	0	107.97	0	0	160.33	0	0	0
	0	0	0	0	0	170.54	0	0	0	0	0	0	26.199	0	0	0	0	0	121.68	0	0	163.16	0	0	6.6516	95.944	0	0	0	0	0	0	0	0	0	0	0	0	0	171.91	0	0	0	112.09	0	0	162.04	0	0
	0	0	167.53	0	170.02	237.55	0	0	0	37.766	0	62.214	77.851	0	0	0	0	120.3	0	83.751	169.16	223.52	168.87	0	118.91	6.7672	0	0	172.53	175.45	0	175.32	0	169.67	103.43	0	110.56	0	180.03	245.64	108.05	0	129.09	0	0	170.88	0	0	0
	0	0	0	0	0	177.81	0	0	0	0	25.377	0	61.346	0	0	0	0	0	124.39	0	0	166.72	0	0	13.517	118.43	0	0	235.71	0	179.33	0	0	0	0	106.25	0	108.68	0	182.58	0	95.749	0	125.58	147.59	0	173.61	0	0
[truncated: 65 more columns]

## Sheet: Sheet3
Fig 2A left
		2	3	4	5	6	7	8	9	10	11	12	13	14	15	16	17
	70	0.15366	0.15291	0.1572	0.16099	0.16634	0.16535	0.16387	0.16921	0.17536	0.18275	0.15785	0.12932	0.15547	0.15792	0.16804	0.17639
	67.5	0.1494	0.15061	0.15602	0.15957	0.16145	0.16885	0.17188	0.17892	0.12986	0.17816	0.18276	0.19618	0.18033	0.18137	0.18327	0.17856
	65	0.15053	0.14806	0.16348	0.16413	0.16752	0.17331	0.18111	0.16596	0.14323	0.11336	0.19228	0.18921	0.17846	0.1749	0.17272	0.16622
	62.5	0.14376	0.14972	0.16123	0.16216	0.17506	0.12732	0.14448	0.18886	0.1913	0.18545	0.17709	0.16472	0.16572	0.16111	0.16008	0.1699
	60	0.1476	0.1468	0.1606	0.17377	0.069747	0.19811	0.17991	0.15921	0.16537	0.16578	0.17413	0.16188	0.16334	0.16792	0.17702	0.19051
	57.5	0.15659	0.16182	0.17293	0.17914	0.16912	0.15845	0.091979	0.20004	0.13885	0.11762	0.17017	0.16346	0.19728	0.22401	0.24741	0.28087
	55	0.15066	0.161	0.17028	0.15936	0.11289	0.16887	0.17255	0.17537	0.10835	0.19054	0.25884	0.145	0.27742	0.27993	0.29054	0.28882
	52.5	0.15053	0.15396	0.17641	0.12092	0.17134	0.15238	0.19071	0.19111	0.28076	0.26347	0.28023	0.30124	0.2984	0.29323	0.28261	0.27508
	50	0.15421	0.15765	0.12896	0.077613	0.16238	0.18104	0.28873	0.27737	0.26295	0.28457	0.30264	0.29556	0.2785	0.28957	0.28877	0.28882
	47.5	0.15405	0.1673	0.052982	0.08456	0.13567	0.23649	0.26646	0.24838	0.28251	0.29743	0.29975	0.29265	0.29609	0.30326	0.3137	0.31107
	45	0.14943	0.17093	0.060734	0.101	0.14495	0.23965	0.24047	0.27408	0.28248	0.29735	0.31568	0.31452	0.32478	0.32283	0.30953	0.33088
	42.5	0.15831	0.17449	0.11226	0.15652	0.21856	0.22501	0.25419	0.27368	0.30319	0.31256	0.31846	0.31643	0.31342	0.32381	0.31033	0.3134
	40	0.16153	0.092948	0.13284	0.17834	0.231	0.2599	0.26049	0.29487	0.30608	0.31524	0.31281	0.31462	0.31779	0.31425	0.31851	0.31497
	37.5	0.15514	0.15914	0.14581	0.23602	0.2658	0.26895	0.28538	0.31109	0.31413	0.31221	0.30682	0.29389	0.30604	0.30501	0.30246	0.306
	35	0.15798	0.1489	0.15106	0.23051	0.25343	0.28004	0.29588	0.29728	0.30073	0.30884	0.28709	0.29431	0.30973	0.28413	0.28628	0.26916
	32.5	0.16323	0.14962	0.16556	0.20694	0.23755	0.28175	0.29194	0.28318	0.29433	0.28551	0.28486	0.27151	0.29117	0.28335	0.24784	0.2216
	30	0.16449	0.085282	0.18126	0.19683	0.22571	0.28833	0.27932	0.27727	0.27828	0.27577	0.26951	0.2639	0.25711	0.24414	0.21376	0.22184
	27.5	0.17318	0.10887	0.20244	0.18963	0.24571	0.2816	0.2756	0.26296	0.26233	0.26629	0.25791	0.24819	0.236	0.18397	0.18321	0.17326
	25	0.17923	0.11704	0.2169	0.1787	0.24982	0.27901	0.24589	0.24824	0.24528	0.23096	0.24074	0.2145	0.17959	0.14698	0.14443	0.15655
	22.5	0.18692	0.14019	0.20164	0.19123	0.24665	0.26541	0.2238	0.25065	0.22124	0.21797	0.20976	0.17626	0.13704	0.13212	0.12037	0.1388
	20	0.10052	0.15302	0.18131	0.21076	0.23119	0.22466	0.20709	0.20632	0.20255	0.20285	0.17803	0.12732	0.11622	0.12209	0.092148	0.14685
	17.5	0.11569	0.17242	0.16677	0.20345	0.2019	0.18495	0.13337	0.14469	0.19704	0.17825	0.12915	0.13334	0.1188	0.12693	0.15859	0.15806
	15	0.16642	0.15682	0.14742	0.15968	0.1746	0.13462	0.12214	0.13489	0.17356	0.15089	0.13296	0.10526	0.13113	0.14914	0.14603	0.13117
	12.5	0.10755	0.11802	0.16844	0.12379	0.13379	0.081299	0.15422	0.10543	0.10932	0.16514	0.10416	0.14792	0.13488	0.12922	0.18431	0.14415
	10	0.13212	0.18836	0.16946	0.10231	0.06754	0.10205	0.13503	0.13699	0.092985	0.16664	0.12865	0.11951	0.1296	0.12192	0.12533	0.052295
	7.5	0.16643	0.122	0.1467	0.068264	0.087924	0.086384	0.11933	0.068898	0.12121	0.16797	0.12301	0.14222	0.13403	0.11619	0.11113	0.051721
	5	0.15984	0.15988	0.19733	0.070747	0.036428	0.08814	0.086835	0.12515	0.12537	0.13324	0.12469	0.11474	0.13064	0.064758	0.11369	0.098954
	2.5	0.1506	0.131	0.069864	0.084605	0.02152	0.11814	0.12879	0.1235	0.13627	0.13275	0.11671	0.098011	0.10672	0.13055	0.090817	0.064986

## Sheet: Sheet4
Fig 2A right
		2	3	4	5	6	7	8	9	10	11	12	13	14	15	16	17
	70	0.1797	0.17475	0.18261	0.18751	0.1991	0.19827	0.19212	0.20393	0.22131	0.23582	0.16437	0.14555	0.18544	0.1823	0.18386	0.18405
	67.5	0.16531	0.16933	0.18031	0.18555	0.18662	0.20489	0.20853	0.23538	0.12874	0.19686	0.18629	0.21211	0.1981	0.19839	0.20271	0.17973
	65	0.16423	0.15874	0.19581	0.19674	0.20228	0.21808	0.27503	0.2282	0.13146	0.13078	0.22372	0.22623	0.21267	0.1997	0.18555	0.1756
	62.5	0.15339	0.16268	0.18729	0.18618	0.21571	0.17594	0.21066	0.22217	0.23751	0.23713	0.22914	0.18257	0.17001	0.15852	0.14291	0.15583
	60	0.16383	0.15187	0.18307	0.22044	0.083035	0.23941	0.24133	0.181	0.19558	0.20268	0.18901	0.15372	0.14146	0.15118	0.17479	0.19648
	57.5	0.18524	0.18904	0.21464	0.23331	0.24649	0.26694	0.13255	0.24864	0.14256	0.18498	0.16063	0.15503	0.22204	0.27165	0.30778	0.35295
	55	0.17128	0.18817	0.21177	0.30605	0.21055	0.24118	0.24051	0.20822	0.12788	0.28392	0.34167	0.23761	0.3909	0.38548	0.38548	0.38602
	52.5	0.16833	0.17208	0.23018	0.16774	0.27177	0.21715	0.24603	0.2517	0.35464	0.35622	0.38169	0.39983	0.39175	0.38394	0.3753	0.36175
	50	0.17886	0.18185	0.21966	0.13069	0.20703	0.28909	0.36357	0.34847	0.35615	0.37558	0.38445	0.37636	0.35694	0.3668	0.36925	0.37315
	47.5	0.18157	0.20573	0.054121	0.088682	0.22887	0.3467	0.34939	0.34541	0.36444	0.36763	0.3694	0.36077	0.36128	0.37762	0.38429	0.39461
	45	0.16931	0.21454	0.11014	0.17255	0.22718	0.33673	0.3373	0.35048	0.35044	0.36118	0.37288	0.36768	0.39248	0.39283	0.38283	0.39555
	42.5	0.18773	0.22974	0.17519	0.21525	0.31381	0.34175	0.32667	0.33372	0.36945	0.37394	0.3789	0.36998	0.38231	0.39199	0.38072	0.38939
	40	0.19709	0.17571	0.21157	0.23542	0.34241	0.33675	0.32195	0.34737	0.36357	0.3747	0.36556	0.37908	0.37486	0.38428	0.38132	0.38578
	37.5	0.17706	0.24458	0.25785	0.30232	0.35176	0.31738	0.32958	0.3638	0.36981	0.372	0.36652	0.36369	0.37091	0.37479	0.3786	0.38876
	35	0.19002	0.21492	0.22271	0.30326	0.30891	0.32203	0.34363	0.36161	0.36462	0.36714	0.35197	0.35002	0.36927	0.3633	0.36253	0.34515
	32.5	0.20154	0.22088	0.21649	0.27424	0.26981	0.33358	0.35141	0.3455	0.35809	0.35609	0.34922	0.33854	0.36233	0.35183	0.3321	0.3144
	30	0.20019	0.11696	0.22048	0.24396	0.26642	0.32876	0.33953	0.3396	0.33217	0.33965	0.34346	0.33713	0.33467	0.31782	0.2909	0.28204
	27.5	0.21971	0.15833	0.24795	0.21192	0.28688	0.33077	0.33397	0.3249	0.32489	0.32277	0.31801	0.3086	0.30323	0.25797	0.25226	0.23335
	25	0.22987	0.18014	0.25053	0.21331	0.30415	0.33281	0.298	0.3089	0.30078	0.31067	0.31493	0.28778	0.24398	0.21906	0.20921	0.20846
	22.5	0.24299	0.19283	0.22998	0.23872	0.28928	0.31252	0.28768	0.31341	0.28629	0.29739	0.27042	0.24444	0.19683	0.19972	0.16482	0.18923
	20	0.13777	0.18255	0.21278	0.25471	0.28816	0.27526	0.25902	0.26827	0.27074	0.26442	0.25303	0.18643	0.17684	0.16521	0.11076	0.18751
	17.5	0.19011	0.17547	0.2049	0.25113	0.27181	0.2741	0.16589	0.19896	0.2742	0.23338	0.17915	0.18406	0.15564	0.18207	0.20016	0.19877
	15	0.23381	0.1715	0.19616	0.19293	0.26252	0.20787	0.13792	0.19777	0.25791	0.20355	0.17502	0.1278	0.18011	0.18405	0.1847	0.19289
	12.5	0.15689	0.14235	0.28865	0.20519	0.23103	0.16848	0.17452	0.18274	0.17238	0.21526	0.154	0.19273	0.20943	0.10679	0.24025	0.22957
	10	0.14059	0.18824	0.25809	0.1929	0.18446	0.17787	0.16083	0.26192	0.16982	0.23908	0.21097	0.16093	0.17575	0.12457	0.19717	0.056512
	7.5	0.23296	0.20549	0.21646	0.14594	0.19705	0.22116	0.18057	0.17573	0.14982	0.2973	0.24753	0.22819	0.20554	0.19613	0.15557	0.083285
	5	0.25018	0.21167	0.28297	0.21049	0.15363	0.16818	0.21236	0.20566	0.19758	0.20712	0.23178	0.2086	0.25508	0.1181	0.19815	0.17243
	2.5	0.25796	0.17521	0.17652	0.18713	0.14684	0.26603	0.24698	0.23916	0.23993	0.19061	0.22844	0.24988	0.21694	0.23386	0.19474	0.093702

## Sheet: Sheet5
Fig 2B
		2	3	4	5	6	7	8	9	10	11	12	13	14	15	16	17
	70	1	1	1	1	1	1	1	1	1	1	0.98887	0.99948	0.98464	0.98672	0.98712	0.97825
	67.5	1	1	1	1	1	1	1	1	1	0.98451	0.9711	0.96978	0.97034	0.96902	0.97159	0.978
	65	1	1	1	1	1	1	0.99999	0.96784	0.99677	1	0.93824	0.93326	0.9523	0.96048	0.97298	0.98594
	62.5	1	1	1	1	1	0.99962	0.99765	0.94016	0.94807	0.92955	0.93008	0.97509	0.98364	0.98005	0.97728	0.96054
	60	1	1	1	1	1	0.94556	1	0.94733	0.95922	0.96442	0.95752	0.98049	0.96481	0.95537	0.94568	0.92243
	57.5	1	1	1	1	0.92407	0.94597	1	0.87059	0.96554	0.99999	0.94052	0.93472	0.77819	0.54536	0.30512	0.17904
	55	1	1	1	0.99862	1	1	0.93728	0.93122	0.9785	0.38237	0.31482	0.92502	0.19888	0.37333	0.53357	0.58206
	52.5	1	1	1	1	0.89217	0.95191	0.90877	0.58086	0.22846	0.20512	0.24008	0.57723	0.65546	0.6929	0.68517	0.71017
	50	1	1	0.99999	1	0.93401	0.74286	0.24695	0.2431	0.31598	0.54582	0.75308	0.78615	0.77469	0.76703	0.84594	0.84847
	47.5	1	1	1	1	0.87123	0.17478	0.33279	0.3373	0.76607	0.84289	0.87287	0.86951	0.87228	0.90349	0.89879	0.88344
	45	1	1	1	0.98327	0.59495	0.22531	0.46216	0.81482	0.88529	0.90607	0.91418	0.91127	0.9101	0.91987	0.93622	0.94841
	42.5	1	1	1	0.57	0.40639	0.268	0.84619	0.89798	0.91909	0.93647	0.94425	0.93699	0.94352	0.9628	0.97745	0.98496
	40	1	0.99802	0.99991	0.42879	0.12297	0.83139	0.917	0.92987	0.9488	0.95758	0.96533	0.95866	0.97323	0.98389	0.98481	0.99251
	37.5	1	0.99816	1	0.28994	0.77659	0.90066	0.93275	0.95541	0.96952	0.97577	0.97767	0.97288	0.98138	0.99039	0.9956	0.99549
	35	1	0.99996	0.2186	0.70617	0.88909	0.8787	0.96305	0.96863	0.98471	0.98294	0.97595	0.98838	0.99444	0.99646	0.99795	0.99604
	32.5	1	0.98853	0.33158	0.72798	0.88167	0.95527	0.97825	0.97943	0.99034	0.9875	0.98879	0.99414	0.99733	0.99751	0.99744	0.99748
	30	1	0.9994	0.76754	0.81394	0.91763	0.98231	0.9821	0.98984	0.99175	0.99302	0.99674	0.99704	0.998	0.99851	0.99839	0.99795
	27.5	1	0.99017	0.92884	0.9548	0.97971	0.98993	0.98419	0.99401	0.99506	0.99415	0.9981	0.99919	0.99926	0.99959	0.99862	0.99887
	25	1	0.37786	0.97707	0.98035	0.99175	0.9943	0.99122	0.99739	0.9968	0.99668	0.99917	0.99961	0.9991	0.99946	0.99796	0.99885
	22.5	1	0.8985	0.98916	0.98912	0.99229	0.99424	0.99599	0.99836	0.99746	0.99867	0.99927	0.99927	0.9997	0.99928	0.9991	0.99989
	20	0.99999	0.94779	0.9953	0.99668	0.99662	0.9931	0.99815	0.99869	0.99835	0.99949	0.99939	0.99971	0.99958	0.99956	0.99815	0.99992
	17.5	0.99926	0.98208	0.99817	0.99489	0.99837	0.99318	0.99827	0.99641	0.99965	0.99977	0.99981	0.99969	0.99987	0.99993	0.99975	0.99998
	15	1	0.9825	0.99913	0.99471	0.99896	0.9481	0.91612	0.99121	0.99919	0.99992	0.99984	0.99973	0.99954	0.99847	0.9999	0.99969
	12.5	0.9985	0.96993	0.78856	0.99067	0.97048	0.40903	0.31643	0.77734	0.99453	0.99896	0.99788	0.9859	0.93825	0.80171	0.90441	0.96391
	10	0.99361	0.45323	0.95194	0.69019	0.27078	0.49305	0.65187	0.54887	0.78876	0.87934	0.84306	0.21731	0.21416	0.54309	0.26911	0.36732
	7.5	1	0.70761	0.9996	0.75758	0.9938	0.99995	0.99874	0.98608	0.56043	0.55741	0.78221	0.9963	0.96681	0.99024	0.99414	0.93232
	5	0.99544	0.99999	0.99979	1	0.99999	0.99999	0.99998	1	0.99999	0.99998	1	1	0.99985	1	0.99999	0.99953
	2.5	0.98838	1	1	0.99998	1	0.9993	0.99888	0.98963	0.99671	0.99994	0.99998	0.99792	0.99817	0.99951	0.98499	0.9868

## Sheet: Sheet6
Fig 2D left
		2	3	4	5	6	7	8	9	10	11	12	13	14	15	16	17
	70	0.93138	0.90315	0.87916	0.85536	0.83689	0.81854	0.79923	0.77977	0.75833	0.73386	0.60947	0.597	0.56832	0.56561	0.56307	0.55667
	67.5	0.9279	0.89686	0.8696	0.84176	0.81895	0.79473	0.76666	0.72133	0.63749	0.58794	0.56835	0.56844	0.55748	0.55452	0.55507	0.55151
	65	0.92412	0.88988	0.8586	0.82537	0.79587	0.75959	0.6622	0.58246	0.60681	0.58894	0.5694	0.55874	0.5522	0.54807	0.54293	0.54166
	62.5	0.92004	0.88208	0.84577	0.8049	0.76289	0.64609	0.59036	0.5725	0.56118	0.55243	0.54571	0.53974	0.53283	0.53284	0.52759	0.52511
	60	0.9156	0.87332	0.83053	0.77752	0.65634	0.58301	0.58931	0.56217	0.55506	0.5414	0.53066	0.52739	0.52395	0.52047	0.51986	0.51552
	57.5	0.91076	0.86338	0.81187	0.73222	0.58439	0.57723	0.58928	0.54785	0.53991	0.54257	0.52582	0.52248	0.50307	0.48356	0.45943	0.40454
	55	0.90548	0.85201	0.78791	0.60013	0.58219	0.5893	0.54414	0.53172	0.54802	0.47826	0.36087	0.48053	0.33454	0.32533	0.3189	0.31273
	52.5	0.89969	0.83884	0.75343	0.59486	0.5647	0.54828	0.53537	0.48642	0.34871	0.3307	0.31401	0.29863	0.28645	0.28081	0.28097	0.27757
	50	0.89333	0.82335	0.65529	0.58206	0.54209	0.5472	0.39191	0.34825	0.30854	0.29019	0.26882	0.25936	0.25504	0.25381	0.24809	0.24529
	47.5	0.8863	0.80467	0.58948	0.56852	0.52424	0.4744	0.33704	0.30373	0.26994	0.2448	0.22521	0.22554	0.21742	0.21029	0.21272	0.2151
	45	0.8785	0.78125	0.59628	0.56021	0.49955	0.34375	0.29829	0.26068	0.22502	0.19893	0.18776	0.18808	0.18712	0.19059	0.19319	0.18586
	42.5	0.86982	0.7492	0.57554	0.52853	0.44708	0.30562	0.25967	0.21906	0.18304	0.17307	0.17263	0.17562	0.17598	0.17498	0.16926	0.15515
	40	0.86009	0.65593	0.5524	0.49714	0.32366	0.27133	0.21876	0.17952	0.16343	0.1613	0.16989	0.16768	0.16723	0.15257	0.14692	0.14397
	37.5	0.84912	0.587	0.53127	0.43535	0.29057	0.24657	0.1857	0.15665	0.15525	0.15814	0.16389	0.16141	0.15094	0.13744	0.14038	0.14446
	35	0.83665	0.57574	0.48809	0.36067	0.26373	0.21154	0.16313	0.14772	0.15098	0.15802	0.15388	0.15263	0.13313	0.13473	0.14363	0.15691
	32.5	0.82233	0.55275	0.45949	0.30443	0.25058	0.18779	0.14755	0.1431	0.15168	0.15689	0.1452	0.13484	0.13019	0.13875	0.15247	0.17069
	30	0.80564	0.52962	0.41052	0.27208	0.22501	0.17035	0.13886	0.14329	0.15477	0.15049	0.12704	0.1307	0.13655	0.14667	0.16477	0.17556
	27.5	0.78576	0.50767	0.37497	0.25393	0.20224	0.15867	0.135	0.14426	0.15731	0.14055	0.12153	0.13815	0.14063	0.16134	0.16714	0.18094
	25	0.76107	0.44665	0.34462	0.24056	0.18529	0.1503	0.13345	0.14873	0.15267	0.12562	0.12914	0.14023	0.15522	0.1624	0.16855	0.1868
	22.5	0.7265	0.38947	0.32131	0.21342	0.1747	0.14639	0.13194	0.15489	0.13867	0.12162	0.13283	0.15313	0.16106	0.16288	0.17315	0.18228
	20	0.64761	0.3726	0.30026	0.1778	0.16553	0.1436	0.13312	0.15826	0.12325	0.1337	0.13411	0.16321	0.16195	0.16205	0.17389	0.17768
	17.5	0.61754	0.3446	0.27945	0.13653	0.15843	0.13108	0.13437	0.15246	0.12194	0.13428	0.14288	0.16491	0.16075	0.1616	0.17686	0.17439
	15	0.59147	0.32378	0.25948	0.11801	0.15363	0.12016	0.14536	0.13475	0.13291	0.13466	0.15833	0.166	0.16135	0.1672	0.17946	0.17996
	12.5	0.55286	0.30107	0.212	0.11705	0.15	0.1061	0.15314	0.11784	0.13178	0.13809	0.16446	0.16694	0.15976	0.17065	0.18177	0.19355
	10	0.52733	0.27456	0.2102	0.12826	0.14563	0.10372	0.15392	0.12672	0.13128	0.14446	0.17006	0.1632	0.1599	0.17411	0.19422	0.20638
	7.5	0.49515	0.24677	0.2096	0.13517	0.13976	0.11863	0.15684	0.12869	0.13252	0.15885	0.1693	0.16072	0.16289	0.17857	0.2108	0.2061
	5	0.49155	0.22731	0.20963	0.13839	0.096526	0.13202	0.13776	0.12469	0.13741	0.16612	0.16729	0.15878	0.16785	0.18493	0.19491	0.1743
	2.5	0.38905	0.21716	0.17376	0.14052	0.093317	0.14177	0.12947	0.12246	0.14722	0.1709	0.16522	0.159	0.17546	0.19456	0.17937	0.15593

## Sheet: Sheet7
Fig 2D right
		2	3	4	5	6	7	8	9	10	11	12	13	14	15	16	17
	70	2.5091e-13	5.1266e-14	5.5328e-14	5.1112e-13	1.0086e-13	6.0932e-13	4.6213e-13	3.3579e-13	5.6264e-13	3.7595e-13	0.081119	0.08747	0.088378	0.091047	0.098103	0.093959
	67.5	3.6118e-13	1.9857e-14	4.2107e-13	7.4098e-14	4.4131e-13	6.7694e-13	1.9568e-13	1.9959e-13	0.093167	0.10489	0.099337	0.10481	0.10063	0.099711	0.1034	0.09879
	65	5.6312e-13	1.9389e-13	3.2954e-13	2.8718e-13	5e-13	4.952e-13	0.085518	0.09509	0.1335	0.12408	0.11246	0.10588	0.10482	0.10463	0.1001	0.10381
	62.5	6.6261e-13	9.1821e-13	6.0138e-13	1.42e-13	4.7308e-13	0.094841	0.13051	0.10443	0.098631	0.098244	0.097392	0.087603	0.090604	0.094239	0.090778	0.090482
	60	1.6168e-13	3.1843e-13	1.926e-13	2.9244e-13	0.089194	0.10818	0.14689	0.1066	0.093774	0.089959	0.091739	0.087258	0.089059	0.090463	0.090986	0.091138
	57.5	4.8769e-13	7.7853e-13	2.1577e-13	1.7339e-13	0.12137	0.17092	0.16812	0.094586	0.09583	0.036598	0.086054	0.080121	0.085809	0.10066	0.12235	0.13864
	55	2.4031e-13	1.8836e-13	6.0187e-13	0.11288	0.16229	0.16423	0.12235	0.10217	0.025454	0.10128	0.13581	0.075369	0.13542	0.13529	0.13639	0.13585
	52.5	7.3694e-13	6.7261e-13	3.2973e-13	0.14614	0.16304	0.1224	0.11616	0.11979	0.1331	0.13435	0.13351	0.13188	0.12916	0.12787	0.12957	0.12933
	50	3.0769e-13	1.7993e-13	0.096039	0.15339	0.12535	0.10066	0.1429	0.13264	0.13177	0.13021	0.12611	0.12332	0.12193	0.12265	0.12322	0.12202
	47.5	6.3867e-13	9.8417e-14	0.12967	0.14969	0.12563	0.14731	0.13611	0.12951	0.12622	0.1212	0.115	0.11525	0.11144	0.10889	0.11031	0.11201
	45	5.032e-14	6.5105e-13	0.13361	0.14507	0.12752	0.14145	0.13129	0.12288	0.1163	0.10653	0.10022	0.098975	0.09681	0.098631	0.10157	0.099265
	42.5	6.4148e-13	2.7587e-13	0.1519	0.14425	0.13103	0.13733	0.12487	0.11313	0.099924	0.092831	0.090253	0.089596	0.090695	0.091285	0.089226	0.082107
	40	5.5659e-13	0.078608	0.15766	0.1073	0.14349	0.13191	0.11379	0.097352	0.087915	0.084422	0.084861	0.084827	0.086491	0.080374	0.077835	0.075466
	37.5	3.3356e-13	0.11035	0.15585	0.1192	0.13846	0.12467	0.10011	0.084288	0.081841	0.079726	0.079109	0.08308	0.07949	0.072813	0.073995	0.075074
	35	1.5426e-13	0.12894	0.12818	0.14182	0.13273	0.10999	0.088193	0.077401	0.076681	0.075759	0.078693	0.079628	0.071155	0.071136	0.074381	0.08031
	32.5	1.7441e-13	0.14185	0.1246	0.13945	0.1281	0.099184	0.079703	0.075235	0.072798	0.07386	0.076472	0.072441	0.069918	0.072113	0.077722	0.084835
	30	4.8536e-13	0.14919	0.1333	0.13108	0.11647	0.089974	0.073774	0.074051	0.07045	0.074434	0.069169	0.070736	0.0714	0.075306	0.082397	0.085599
	27.5	2.6087e-13	0.15083	0.13811	0.12593	0.1052	0.083343	0.071288	0.071383	0.07008	0.073301	0.066718	0.072368	0.072216	0.0806	0.082728	0.084895
	25	5.2884e-13	0.14103	0.13764	0.12355	0.097285	0.078081	0.070592	0.069627	0.073408	0.069498	0.069152	0.071563	0.078313	0.080379	0.081704	0.082503
	22.5	2.5116e-13	0.14604	0.13622	0.11631	0.091923	0.074995	0.069726	0.069101	0.071836	0.066815	0.069053	0.07748	0.079745	0.080243	0.080254	0.082708
	20	0.072956	0.14869	0.13211	0.10617	0.086352	0.07344	0.067392	0.066779	0.067545	0.069182	0.069684	0.081134	0.080091	0.079156	0.078427	0.085881
	17.5	0.10617	0.14847	0.12763	0.091505	0.082624	0.068981	0.063897	0.072774	0.066094	0.068779	0.073633	0.081742	0.079583	0.07866	0.085535	0.084318
	15	0.12164	0.1424	0.12225	0.078996	0.079673	0.061625	0.063951	0.070845	0.068503	0.070331	0.079202	0.082193	0.080443	0.082462	0.086597	0.086281
	12.5	0.11814	0.13718	0.030204	0.0735	0.076799	0.060864	0.064534	0.066205	0.06858	0.072255	0.08155	0.083512	0.079987	0.084193	0.086823	0.090724
	10	0.1209	0.13146	0.024434	0.075468	0.073505	0.061703	0.065644	0.065715	0.069311	0.074545	0.084506	0.082143	0.079804	0.085466	0.089655	0.097146
	7.5	0.11382	0.12012	0.028182	0.07498	0.071278	0.063	0.066128	0.065562	0.070946	0.079113	0.084498	0.0805	0.080521	0.086186	0.09593	0.093953
	5	0.13339	0.11153	0.027612	0.074036	0.035364	0.063553	0.070282	0.065673	0.073647	0.082098	0.083572	0.079742	0.082377	0.085298	0.097656	0.086978
	2.5	0.12302	0.10374	0.083975	0.07357	0.02212	0.065878	0.062877	0.066296	0.075153	0.08419	0.082621	0.080715	0.085602	0.090609	0.09014	0.077769

## Sheet: Sheet8
Fig 3A top
		2	3	4	5	6	7	8	9	10	11	12	13	14	15	16	17
	70	NaN	NaN	NaN	NaN	NaN	NaN	NaN	NaN	NaN	NaN	NaN	NaN	NaN	NaN	NaN	NaN
	67.5	NaN	NaN	NaN	NaN	NaN	NaN	NaN	NaN	NaN	NaN	NaN	NaN	NaN	NaN	NaN	NaN
	65	NaN	NaN	NaN	NaN	NaN	NaN	NaN	NaN	NaN	NaN	NaN	NaN	NaN	NaN	NaN	NaN
	62.5	NaN	NaN	NaN	NaN	NaN	NaN	NaN	NaN	NaN	NaN	NaN	NaN	NaN	NaN	NaN	NaN
	60	NaN	NaN	NaN	NaN	NaN	NaN	NaN	NaN	NaN	NaN	NaN	NaN	NaN	NaN	NaN	NaN
	57.5	NaN	NaN	NaN	NaN	NaN	NaN	NaN	NaN	NaN	NaN	NaN	NaN	NaN	NaN	NaN	0.78223
	55	NaN	NaN	NaN	NaN	NaN	NaN	NaN	NaN	NaN	NaN	0.84304	NaN	0.77877	NaN	NaN	NaN
	52.5	NaN	NaN	NaN	NaN	NaN	NaN	NaN	NaN	0.73052	0.73598	0.75025	NaN	NaN	NaN	NaN	NaN
	50	NaN	NaN	NaN	NaN	NaN	NaN	0.79055	0.69839	0.70304	NaN	NaN	NaN	NaN	NaN	NaN	NaN
	47.5	NaN	NaN	NaN	NaN	NaN	0.71462	NaN	NaN	NaN	NaN	NaN	NaN	NaN	NaN	NaN	NaN
	45	NaN	NaN	NaN	NaN	NaN	0.741	NaN	NaN	NaN	NaN	NaN	NaN	NaN	NaN	NaN	NaN
	42.5	NaN	NaN	NaN	NaN	NaN	0.79982	NaN	NaN	NaN	NaN	NaN	NaN	NaN	NaN	NaN	NaN
	40	NaN	NaN	NaN	NaN	0.82874	NaN	NaN	NaN	NaN	NaN	NaN	NaN	NaN	NaN	NaN	NaN
	37.5	NaN	NaN	NaN	NaN	NaN	NaN	NaN	NaN	NaN	NaN	NaN	NaN	NaN	NaN	NaN	NaN
	35	NaN	NaN	NaN	NaN	NaN	NaN	NaN	NaN	NaN	NaN	NaN	NaN	NaN	NaN	NaN	NaN
	32.5	NaN	NaN	NaN	NaN	NaN	NaN	NaN	NaN	NaN	NaN	NaN	NaN	NaN	NaN	NaN	NaN
	30	NaN	NaN	NaN	NaN	NaN	NaN	NaN	NaN	NaN	NaN	NaN	NaN	NaN	NaN	NaN	NaN
	27.5	NaN	NaN	NaN	NaN	NaN	NaN	NaN	NaN	NaN	NaN	NaN	NaN	NaN	NaN	NaN	NaN
	25	NaN	NaN	NaN	NaN	NaN	NaN	NaN	NaN	NaN	NaN	NaN	NaN	NaN	NaN	NaN	NaN
	22.5	NaN	NaN	NaN	NaN	NaN	NaN	NaN	NaN	NaN	NaN	NaN	NaN	NaN	NaN	NaN	NaN
	20	NaN	NaN	NaN	NaN	NaN	NaN	NaN	NaN	NaN	NaN	NaN	NaN	NaN	NaN	NaN	NaN
	17.5	NaN	NaN	NaN	NaN	NaN	NaN	NaN	NaN	NaN	NaN	NaN	NaN	NaN	NaN	NaN	NaN
	15	NaN	NaN	NaN	NaN	NaN	NaN	NaN	NaN	NaN	NaN	NaN	NaN	NaN	NaN	NaN	NaN
	12.5	NaN	NaN	NaN	NaN	NaN	NaN	NaN	NaN	NaN	NaN	NaN	NaN	NaN	NaN	NaN	NaN
	10	NaN	NaN	NaN	NaN	NaN	NaN	NaN	NaN	NaN	NaN	NaN	NaN	NaN	NaN	NaN	NaN
	7.5	NaN	NaN	NaN	NaN	NaN	NaN	NaN	NaN	NaN	NaN	NaN	NaN	NaN	NaN	NaN	NaN
	5	NaN	NaN	NaN	NaN	NaN	NaN	NaN	NaN	NaN	NaN	NaN	NaN	NaN	NaN	NaN	NaN
	2.5	NaN	NaN	NaN	NaN	NaN	NaN	NaN	NaN	NaN	NaN	NaN	NaN	NaN	NaN	NaN	NaN
(NaN for non-selected parameter sets)

## Sheet: Sheet9
Fig 3A bottom
		2	3	4	5	6	7	8	9	10	11	12	13	14	15	16	17
	70	NaN	NaN	NaN	NaN	NaN	NaN	NaN	NaN	NaN	NaN	NaN	NaN	NaN	NaN	NaN	NaN
	67.5	NaN	NaN	NaN	NaN	NaN	NaN	NaN	NaN	NaN	NaN	NaN	NaN	NaN	NaN	NaN	NaN
	65	NaN	NaN	NaN	NaN	NaN	NaN	NaN	NaN	NaN	NaN	NaN	NaN	NaN	NaN	NaN	NaN
	62.5	NaN	NaN	NaN	NaN	NaN	NaN	NaN	NaN	NaN	NaN	NaN	NaN	NaN	NaN	NaN	NaN
	60	NaN	NaN	NaN	NaN	NaN	NaN	NaN	NaN	NaN	NaN	NaN	NaN	NaN	NaN	NaN	NaN
	57.5	NaN	NaN	NaN	NaN	NaN	NaN	NaN	NaN	NaN	NaN	NaN	NaN	NaN	NaN	NaN	0.75755
	55	NaN	NaN	NaN	NaN	NaN	NaN	NaN	NaN	NaN	NaN	0.80015	NaN	0.68886	NaN	NaN	NaN
	52.5	NaN	NaN	NaN	NaN	NaN	NaN	NaN	NaN	0.67354	0.67596	0.69969	NaN	NaN	NaN	NaN	NaN
	50	NaN	NaN	NaN	NaN	NaN	NaN	0.77604	0.62306	0.65719	NaN	NaN	NaN	NaN	NaN	NaN	NaN
	47.5	NaN	NaN	NaN	NaN	NaN	0.6548	NaN	NaN	NaN	NaN	NaN	NaN	NaN	NaN	NaN	NaN
	45	NaN	NaN	NaN	NaN	NaN	0.65481	NaN	NaN	NaN	NaN	NaN	NaN	NaN	NaN	NaN	NaN
	42.5	NaN	NaN	NaN	NaN	NaN	0.72048	NaN	NaN	NaN	NaN	NaN	NaN	NaN	NaN	NaN	NaN
	40	NaN	NaN	NaN	NaN	0.7558	NaN	NaN	NaN	NaN	NaN	NaN	NaN	NaN	NaN	NaN	NaN
	37.5	NaN	NaN	NaN	NaN	NaN	NaN	NaN	NaN	NaN	NaN	NaN	NaN	NaN	NaN	NaN	NaN
	35	NaN	NaN	NaN	NaN	NaN	NaN	NaN	NaN	NaN	NaN	NaN	NaN	NaN	NaN	NaN	NaN
	32.5	NaN	NaN	NaN	NaN	NaN	NaN	NaN	NaN	NaN	NaN	NaN	NaN	NaN	NaN	NaN	NaN
	30	NaN	NaN	NaN	NaN	NaN	NaN	NaN	NaN	NaN	NaN	NaN	NaN	NaN	NaN	NaN	NaN
	27.5	NaN	NaN	NaN	NaN	NaN	NaN	NaN	NaN	NaN	NaN	NaN	NaN	NaN	NaN	NaN	NaN
	25	NaN	NaN	NaN	NaN	NaN	NaN	NaN	NaN	NaN	NaN	NaN	NaN	NaN	NaN	NaN	NaN
	22.5	NaN	NaN	NaN	NaN	NaN	NaN	NaN	NaN	NaN	NaN	NaN	NaN	NaN	NaN	NaN	NaN
	20	NaN	NaN	NaN	NaN	NaN	NaN	NaN	NaN	NaN	NaN	NaN	NaN	NaN	NaN	NaN	NaN
	17.5	NaN	NaN	NaN	NaN	NaN	NaN	NaN	NaN	NaN	NaN	NaN	NaN	NaN	NaN	NaN	NaN
	15	NaN	NaN	NaN	NaN	NaN	NaN	NaN	NaN	NaN	NaN	NaN	NaN	NaN	NaN	NaN	NaN
	12.5	NaN	NaN	NaN	NaN	NaN	NaN	NaN	NaN	NaN	NaN	NaN	NaN	NaN	NaN	NaN	NaN
	10	NaN	NaN	NaN	NaN	NaN	NaN	NaN	NaN	NaN	NaN	NaN	NaN	NaN	NaN	NaN	NaN
	7.5	NaN	NaN	NaN	NaN	NaN	NaN	NaN	NaN	NaN	NaN	NaN	NaN	NaN	NaN	NaN	NaN
	5	NaN	NaN	NaN	NaN	NaN	NaN	NaN	NaN	NaN	NaN	NaN	NaN	NaN	NaN	NaN	NaN
	2.5	NaN	NaN	NaN	NaN	NaN	NaN	NaN	NaN	NaN	NaN	NaN	NaN	NaN	NaN	NaN	NaN
(NaN for non-selected parameter sets)

## Sheet: Sheet10
Fig 3B top
	Actual	Surrogate
	0.69642	0.20984
	0.85417	0.079719
	0.77541	1.054
	0.77059	0.52989
	0.97474	0.85147
	0.79811	0.54677
	0.72853	0.76947
	0.73936	0.515
	0.56922	0.55547
	0.80304	0.56426
	0.69415	0.48118
	0.9132	0.52748
	0.86818	0.51138
	0.73656	0.46973
	0.85944	0.53034
	0.70541	0.66593
	0.69329	0.5578
	0.72558	0.065459
	0.84958	0.56294
	0.68362	0.54379
	1.0236	0.23076
	0.88624	0.53216
	0.8242	0.36214
	0.78783	0.54266
	0.71218	0.37858
	0.6859	0.58351
	0.72505	0.15678
	1.0344	0.55406
	0.81961	0.53705
	0.81872	0.58724
	0.92666	0.69606
	0.81571	0.48704
	0.6194	0.5745
	0.70909	0.54129
	0.76718	0.54264
	0.9281	0.7568
	0.91454	0.59766
	0.84854	0.58941
	0.87306	0.02259
	0.68428	0.55754
	0.90174	0.87679
	0.79378	1.1037
	0.86269	0.66931
	0.97065	0.58158
	1.2458	0.61009
	0.90729	0.1623
	0.82374	0.50605
	0.94254	0.048346
	0.69536	0.51207
	0.82595	0.48761
	0.78183	0.55329
	0.96586	0.76342
	0.92274	0.75717
	0.84091	0.36631
	1.0646	0.40437
	0.63878	0.11145
	1.0128	0.49773
	0.80268	1.1232
	0.78054	0.76283
	0.70943	0.50806
	0.76202	0.60419
	0.92861	0.53325
	0.87653	0.0094579
	1.0687	0.41946
	0.97976	0.59412
	0.83751	1.0297
	0.74011	0.5712
	0.85066	0.54916
	0.8449	0.54481
	0.84433	0.5608
	1.0873	0.068219
	0.89241	0.058821
	0.75632	0.91222
	0.88977	0.54324
	1.1133	0.20329
	0.77367	0.17139
	0.92206	0.55784
	0.66886	0.037164
	0.97796	0.52387
	0.93607	0.69264
	0.61678	0.54872
	1.1719	0.54914
	0.9998	0.53464
	0.73158	0.99344
	1.1113	0.85076
	0.98249	0.29877
	0.79485	1.1417
	0.83858	1.4789
	0.6698	0.54006
	1.0852	0.088194
	0.83234	0.53964
	0.74904	0.046647
	0.82382	0.59084
	0.86563	0.50212
	0.66103	0.62781
	1.0206	0.49228
	0.83755	0.55496
	0.88846	0.0048595
	0.69972	0.25283
	0.84016	0.26624

[truncated: 18 more sheets: Sheet11, Sheet12, Sheet13, Sheet14, Sheet15, Sheet16, Sheet17, Sheet18, Sheet19, Sheet20, Sheet21, Sheet22, Sheet23, Sheet24, Sheet25, Sheet26, Sheet27, Sheet28]
