# Supplementary material
Source: publisher figshare collection journal article supplement (https://plos.figshare.com/articles/dataset/_/7128626)

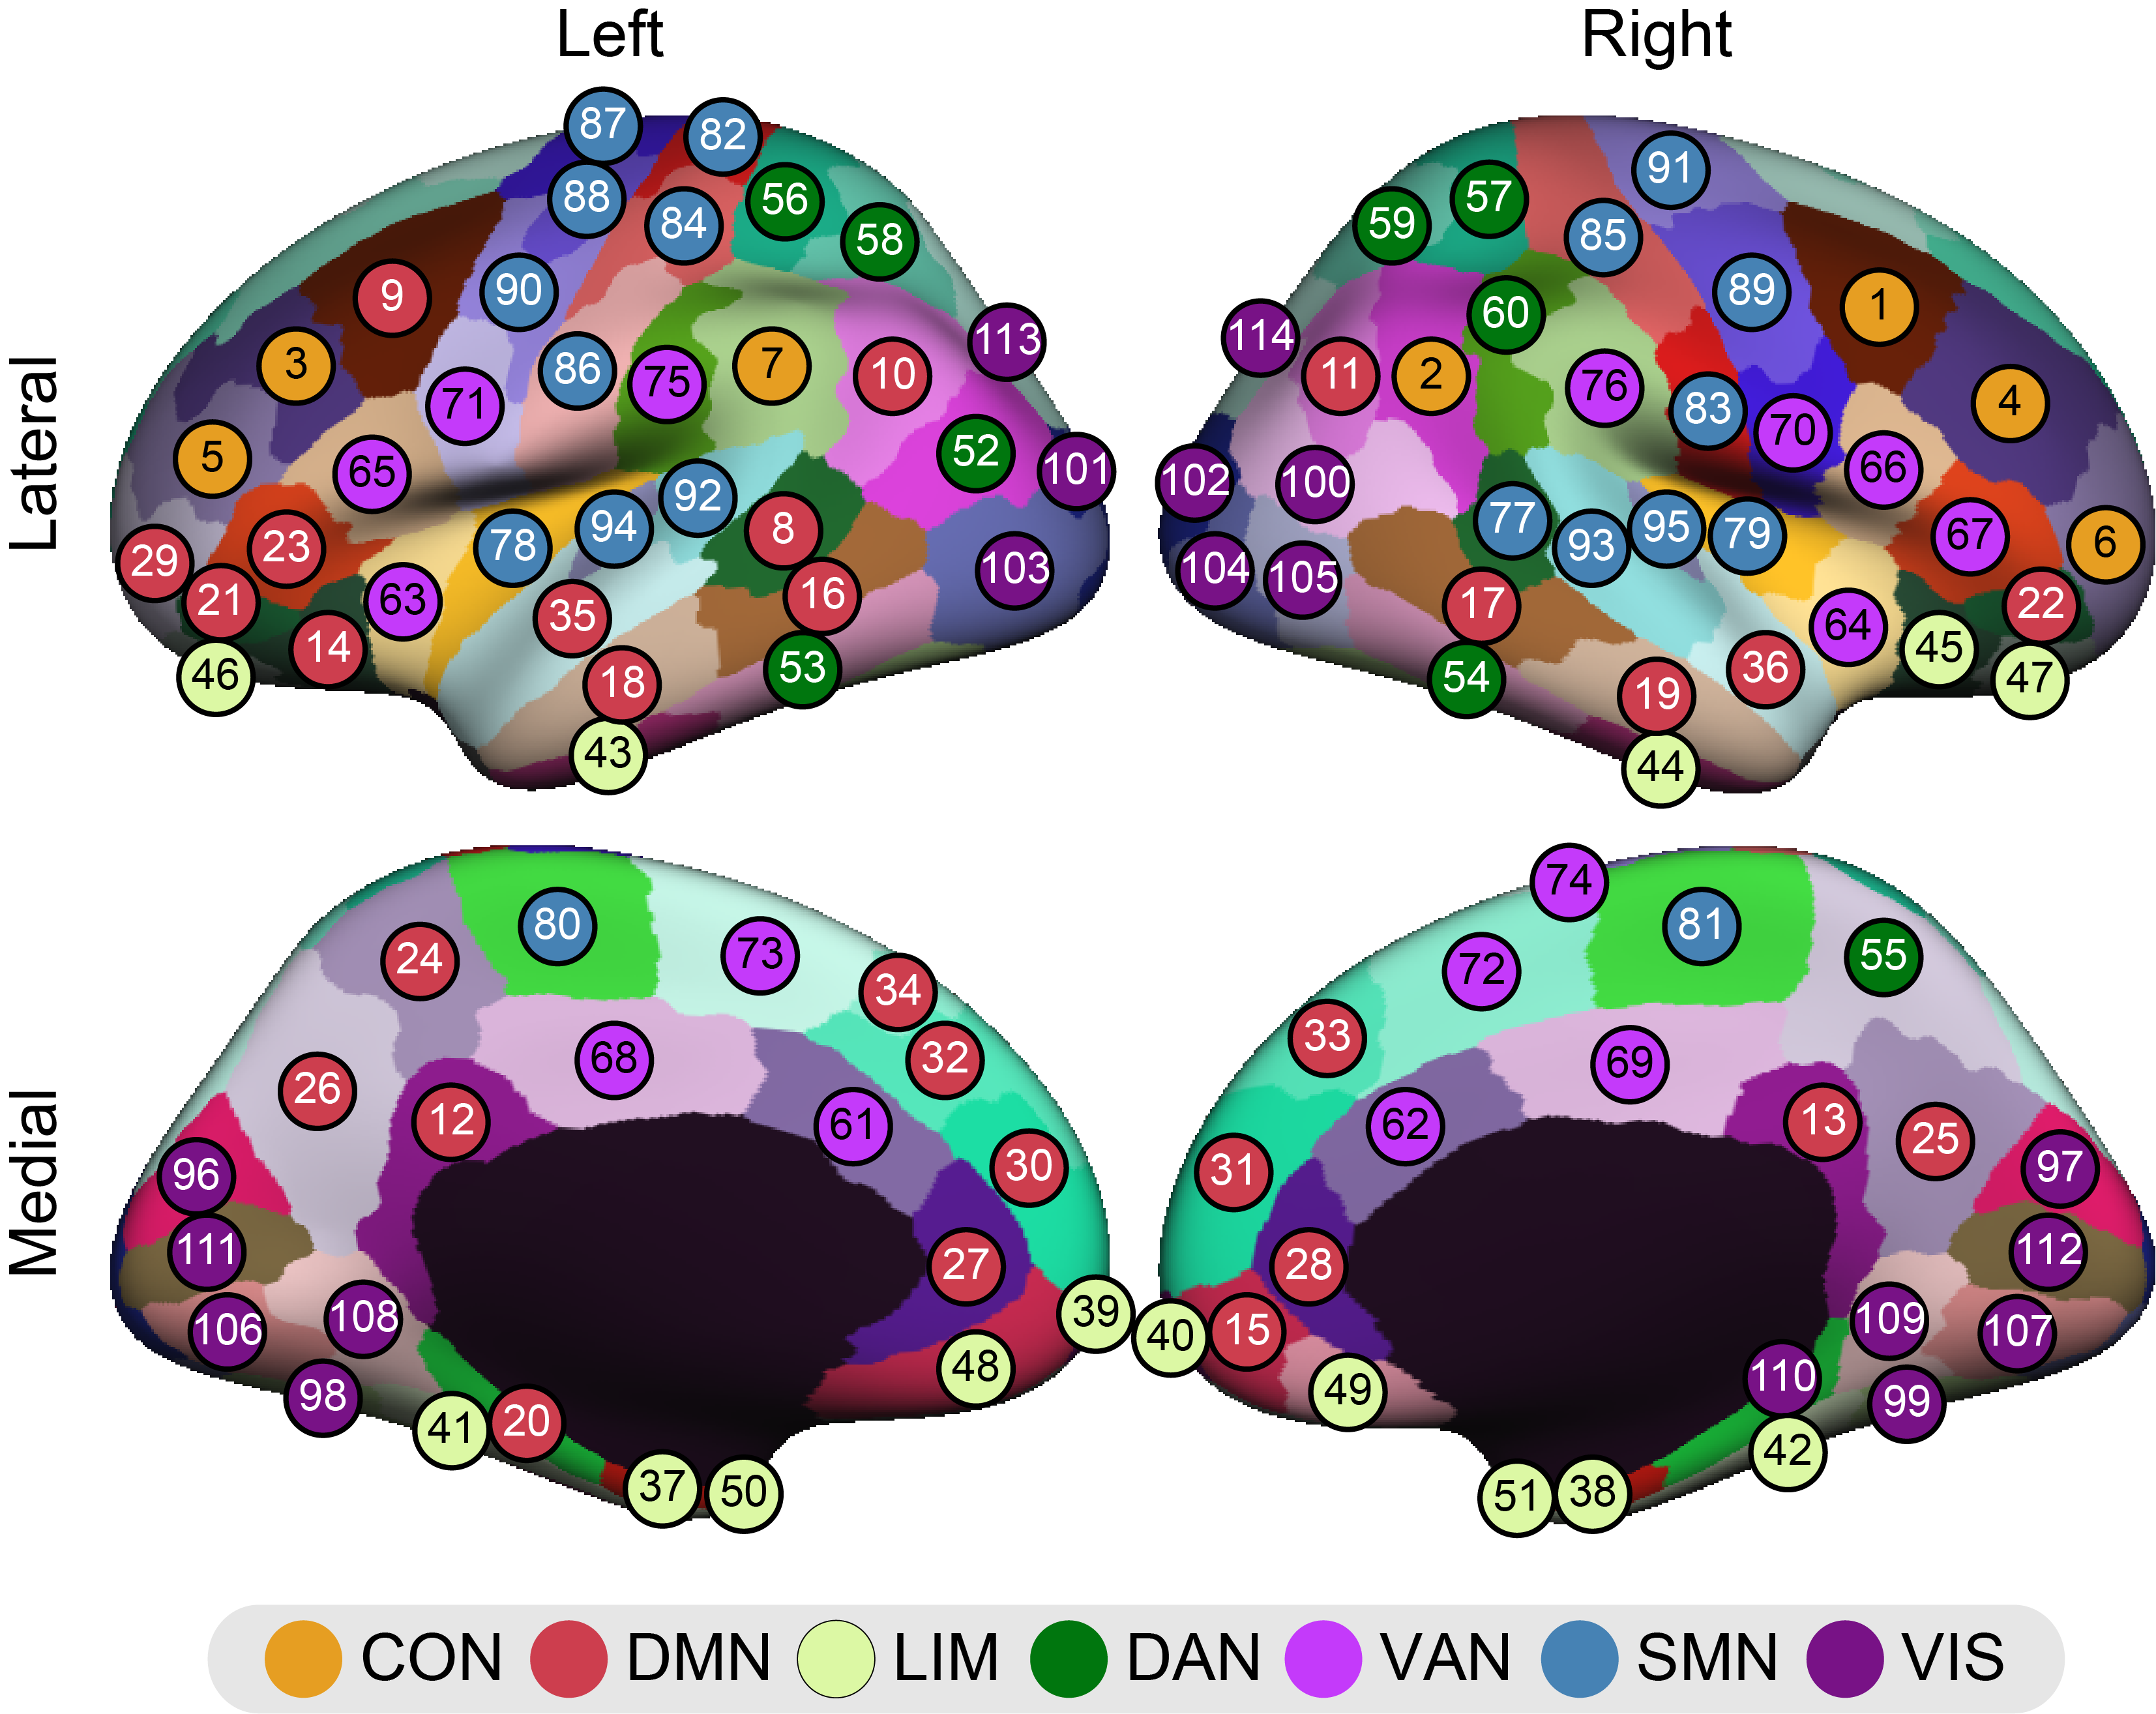

Supplement: Supplementary file 1 [file 1 › pcbi.1006497.s001.tif]

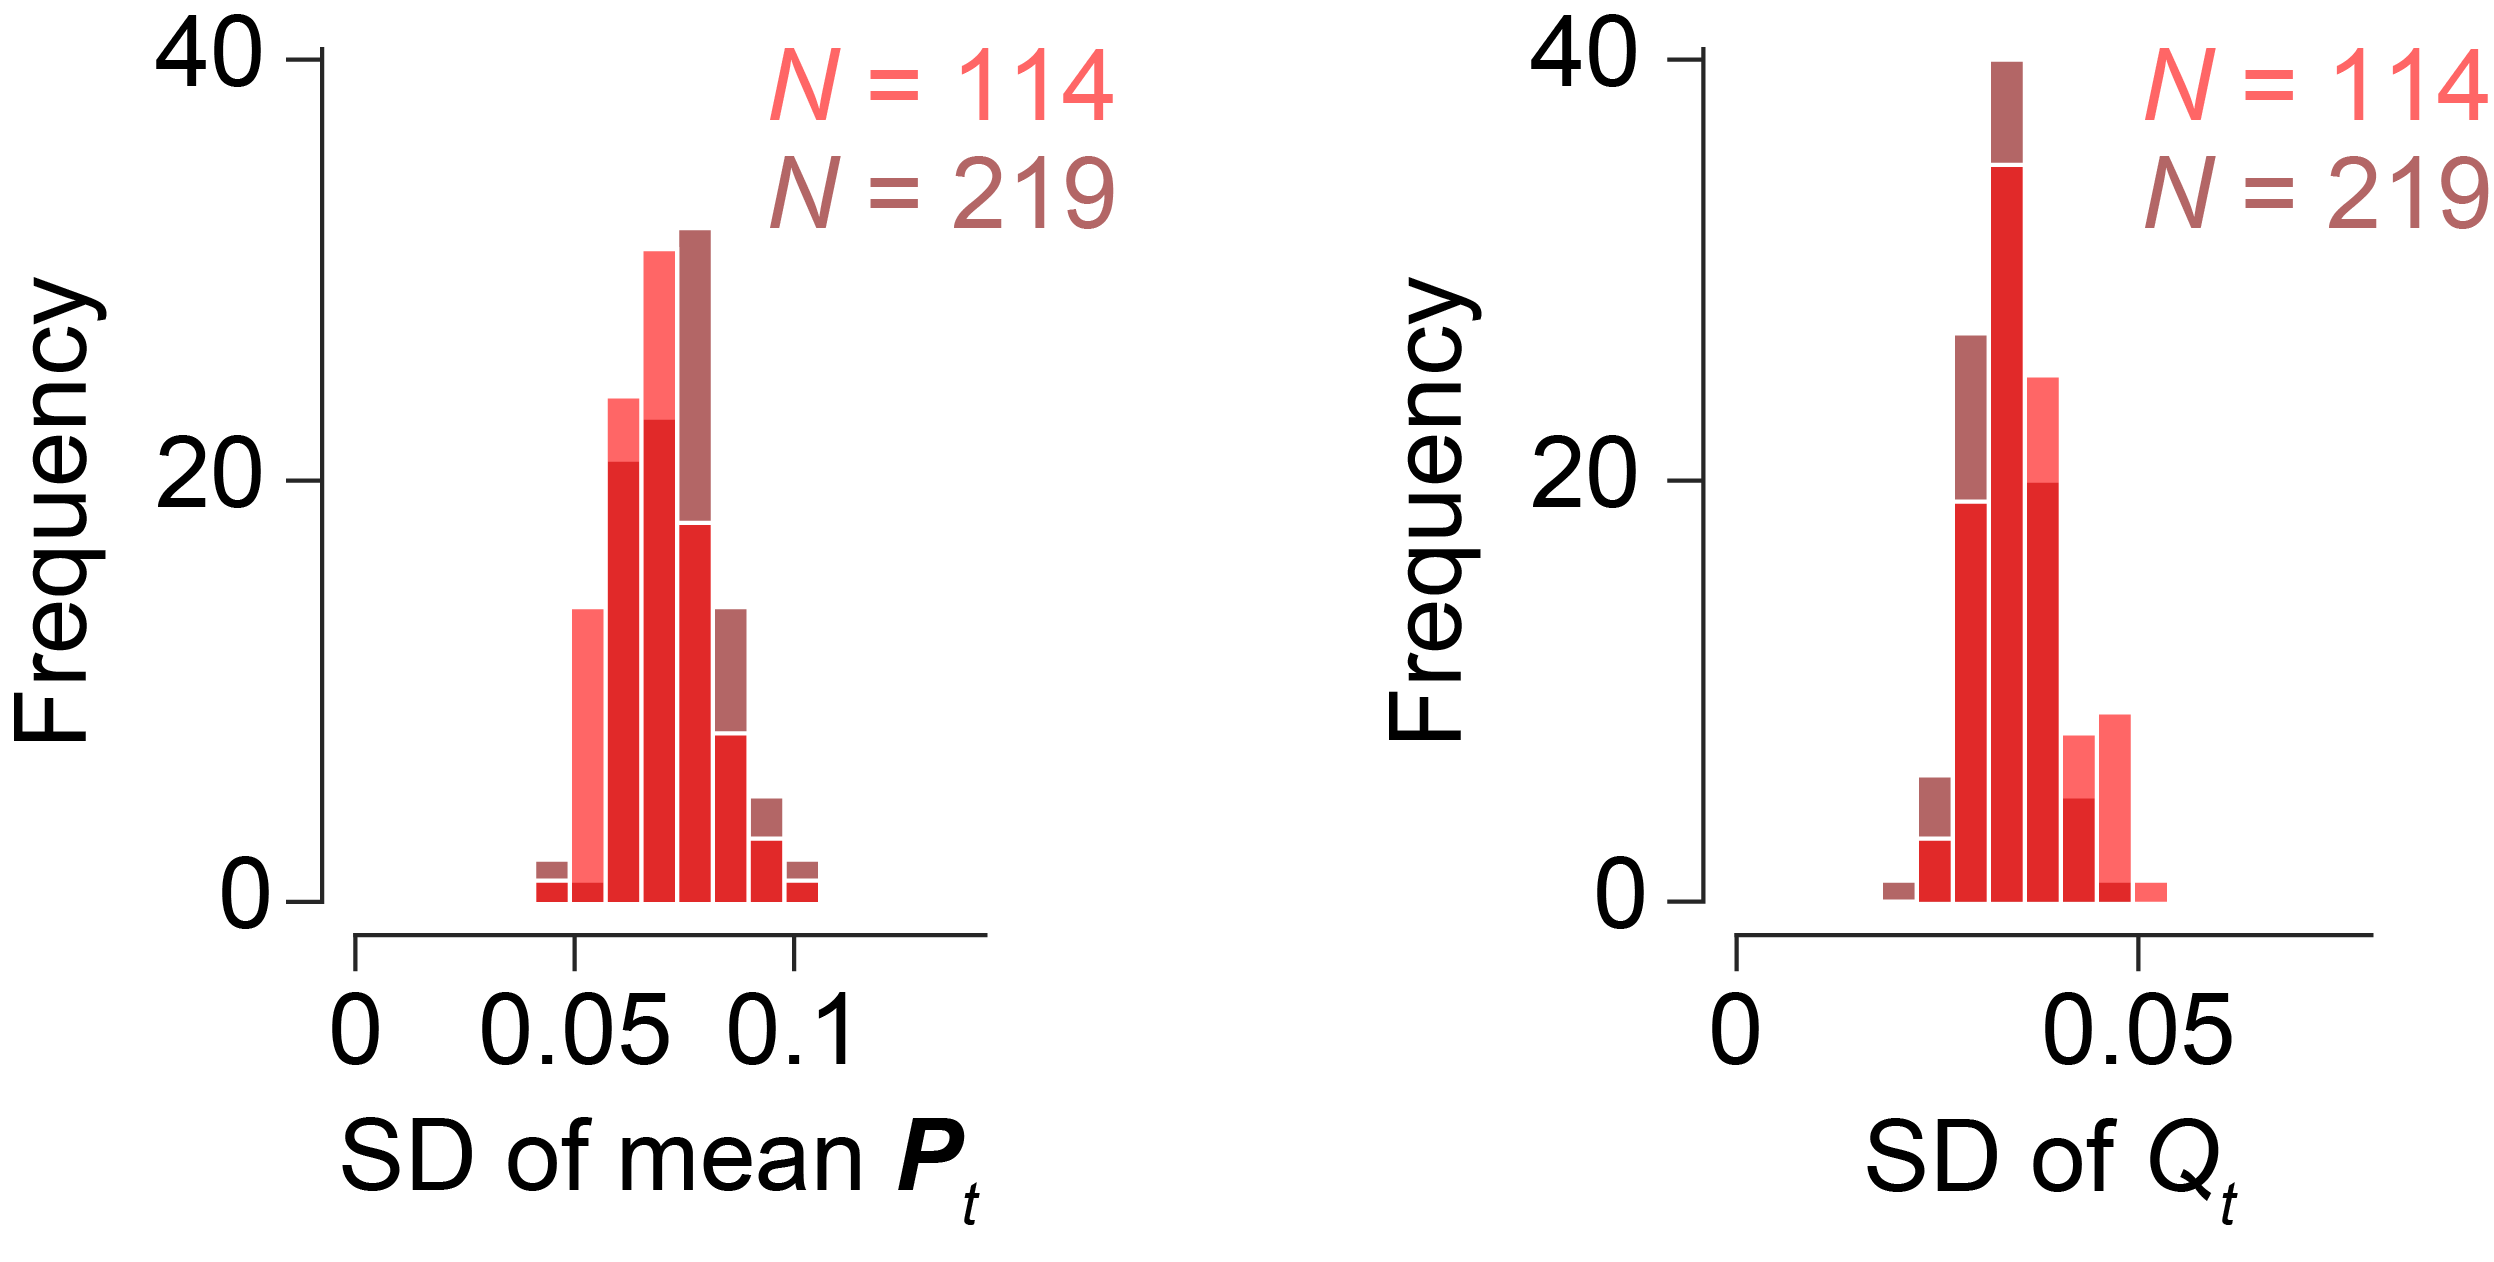

Supplement: Supplementary file 1 [file 1 › pcbi.1006497.s002.tif]

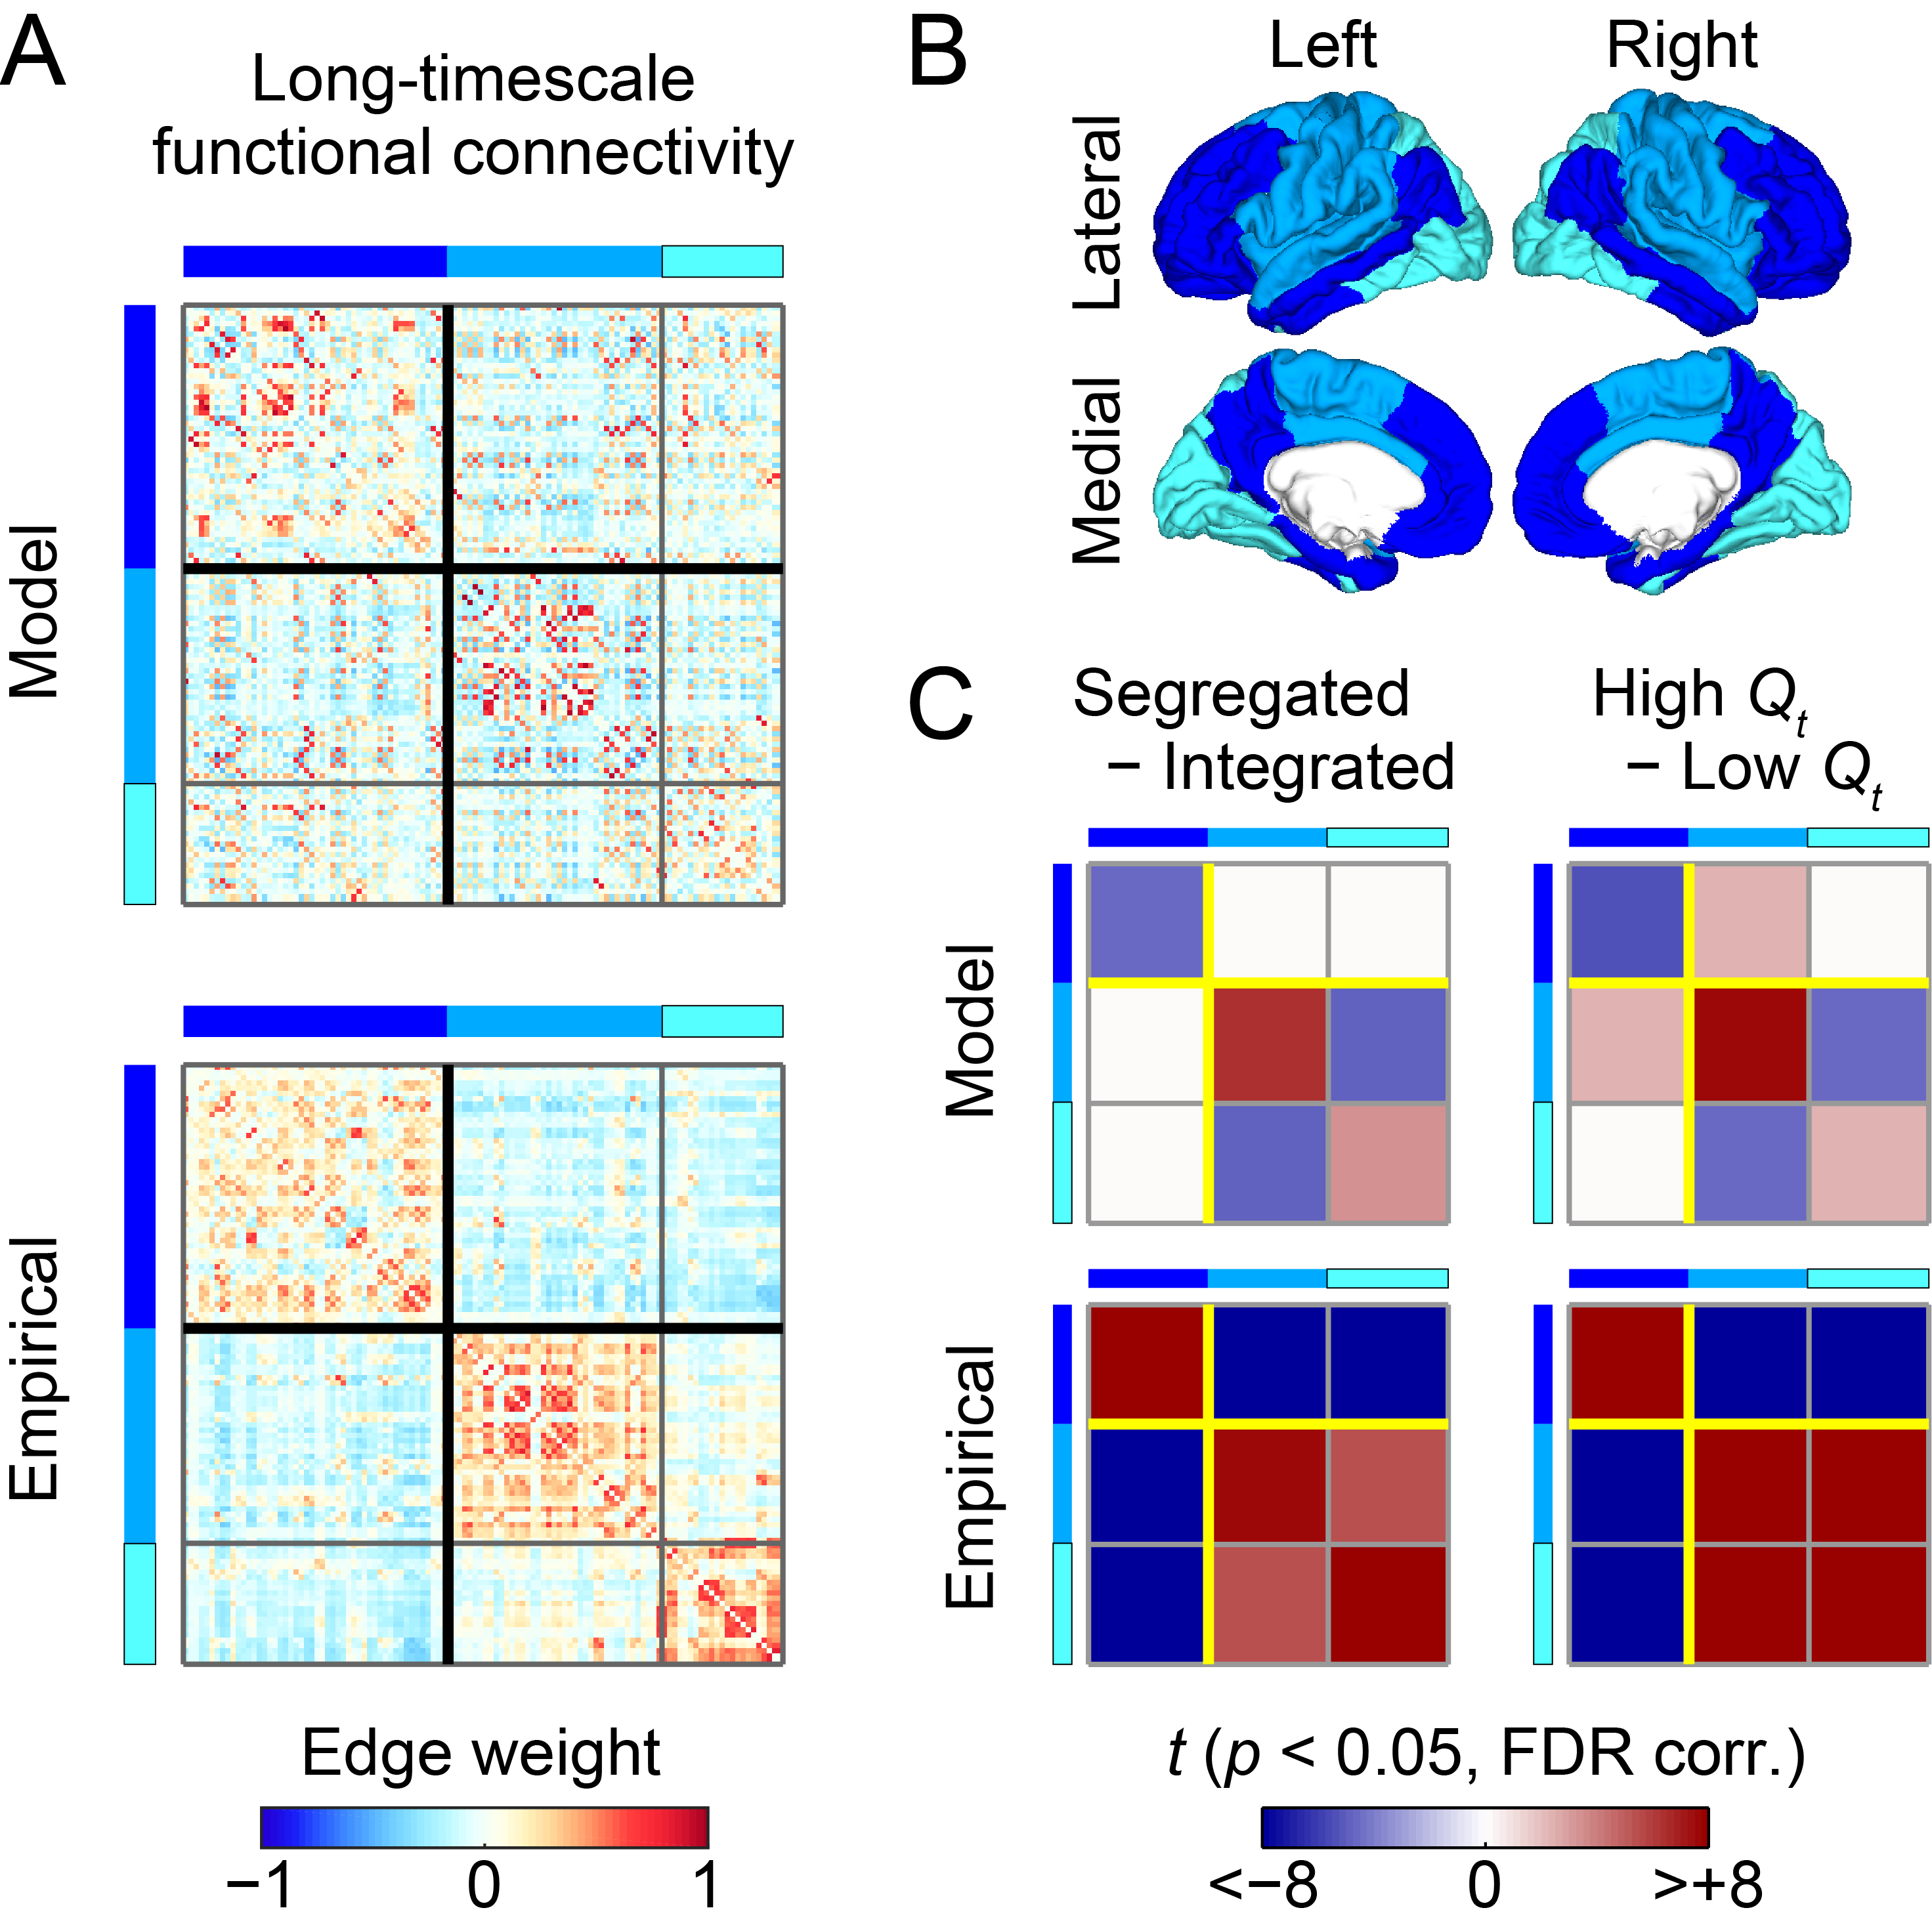

Supplement: Supplementary file 1 [file 1 › pcbi.1006497.s003.tif]

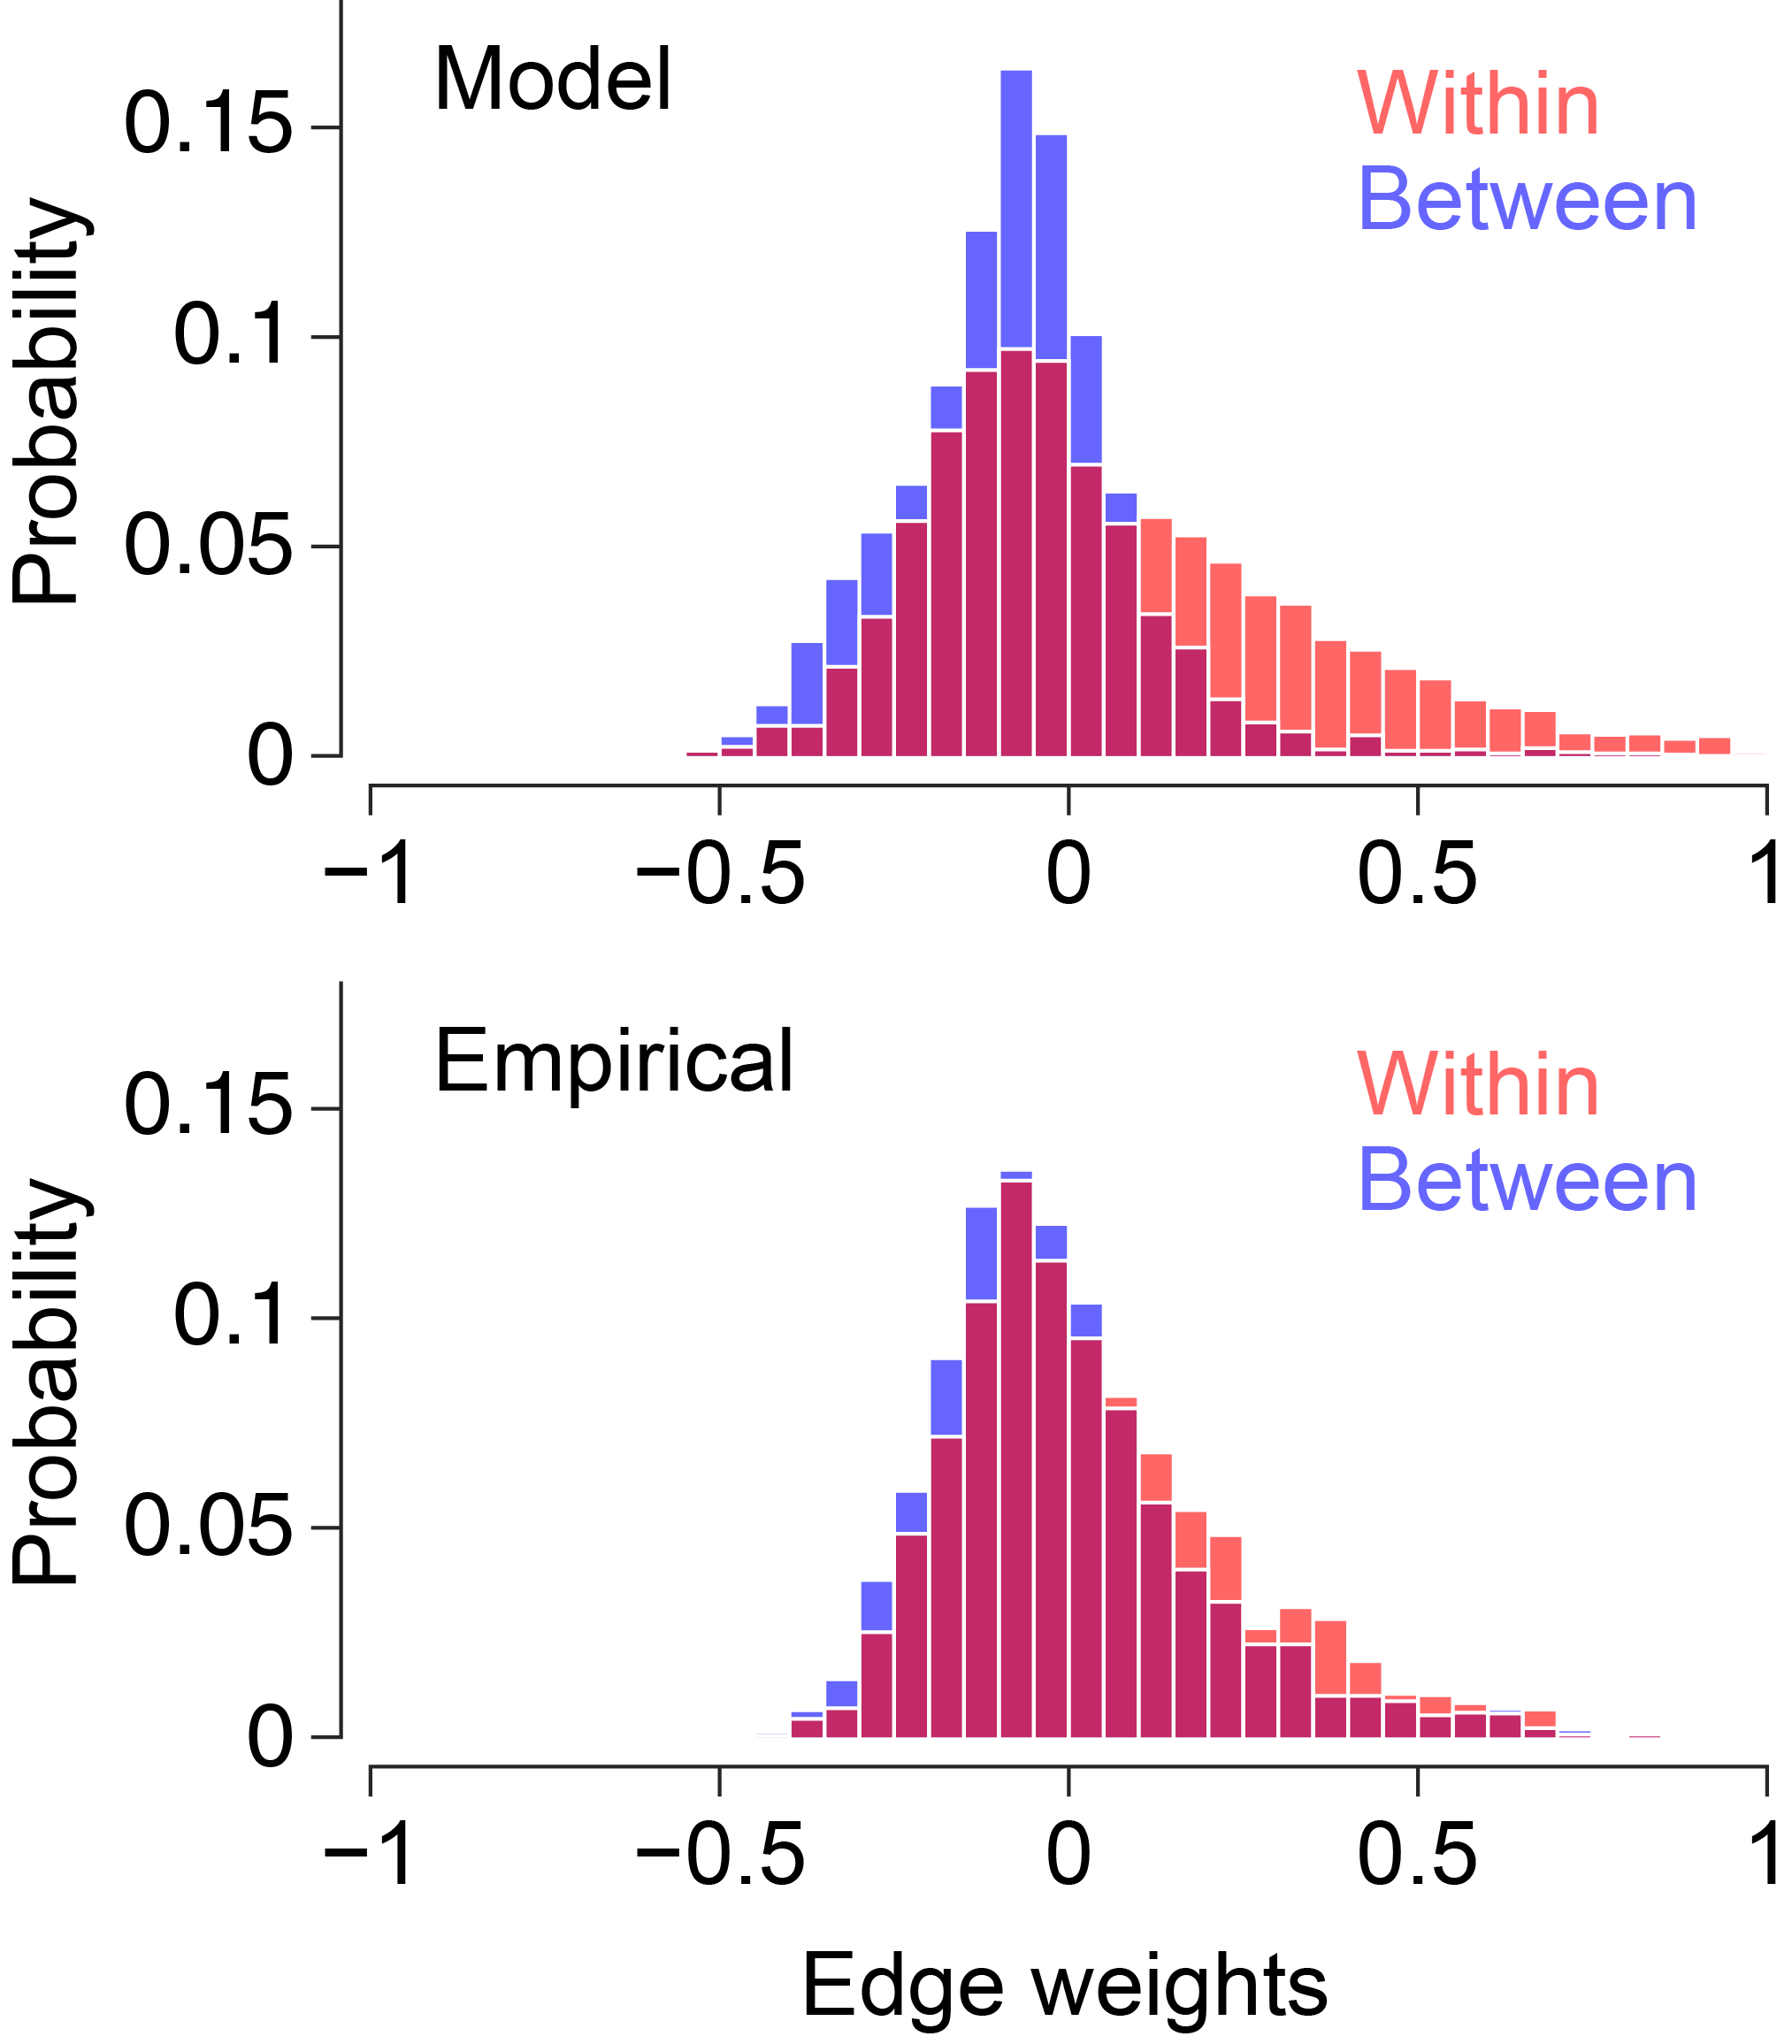

Supplement: Supplementary file 1 [file 1 › pcbi.1006497.s004.tif]

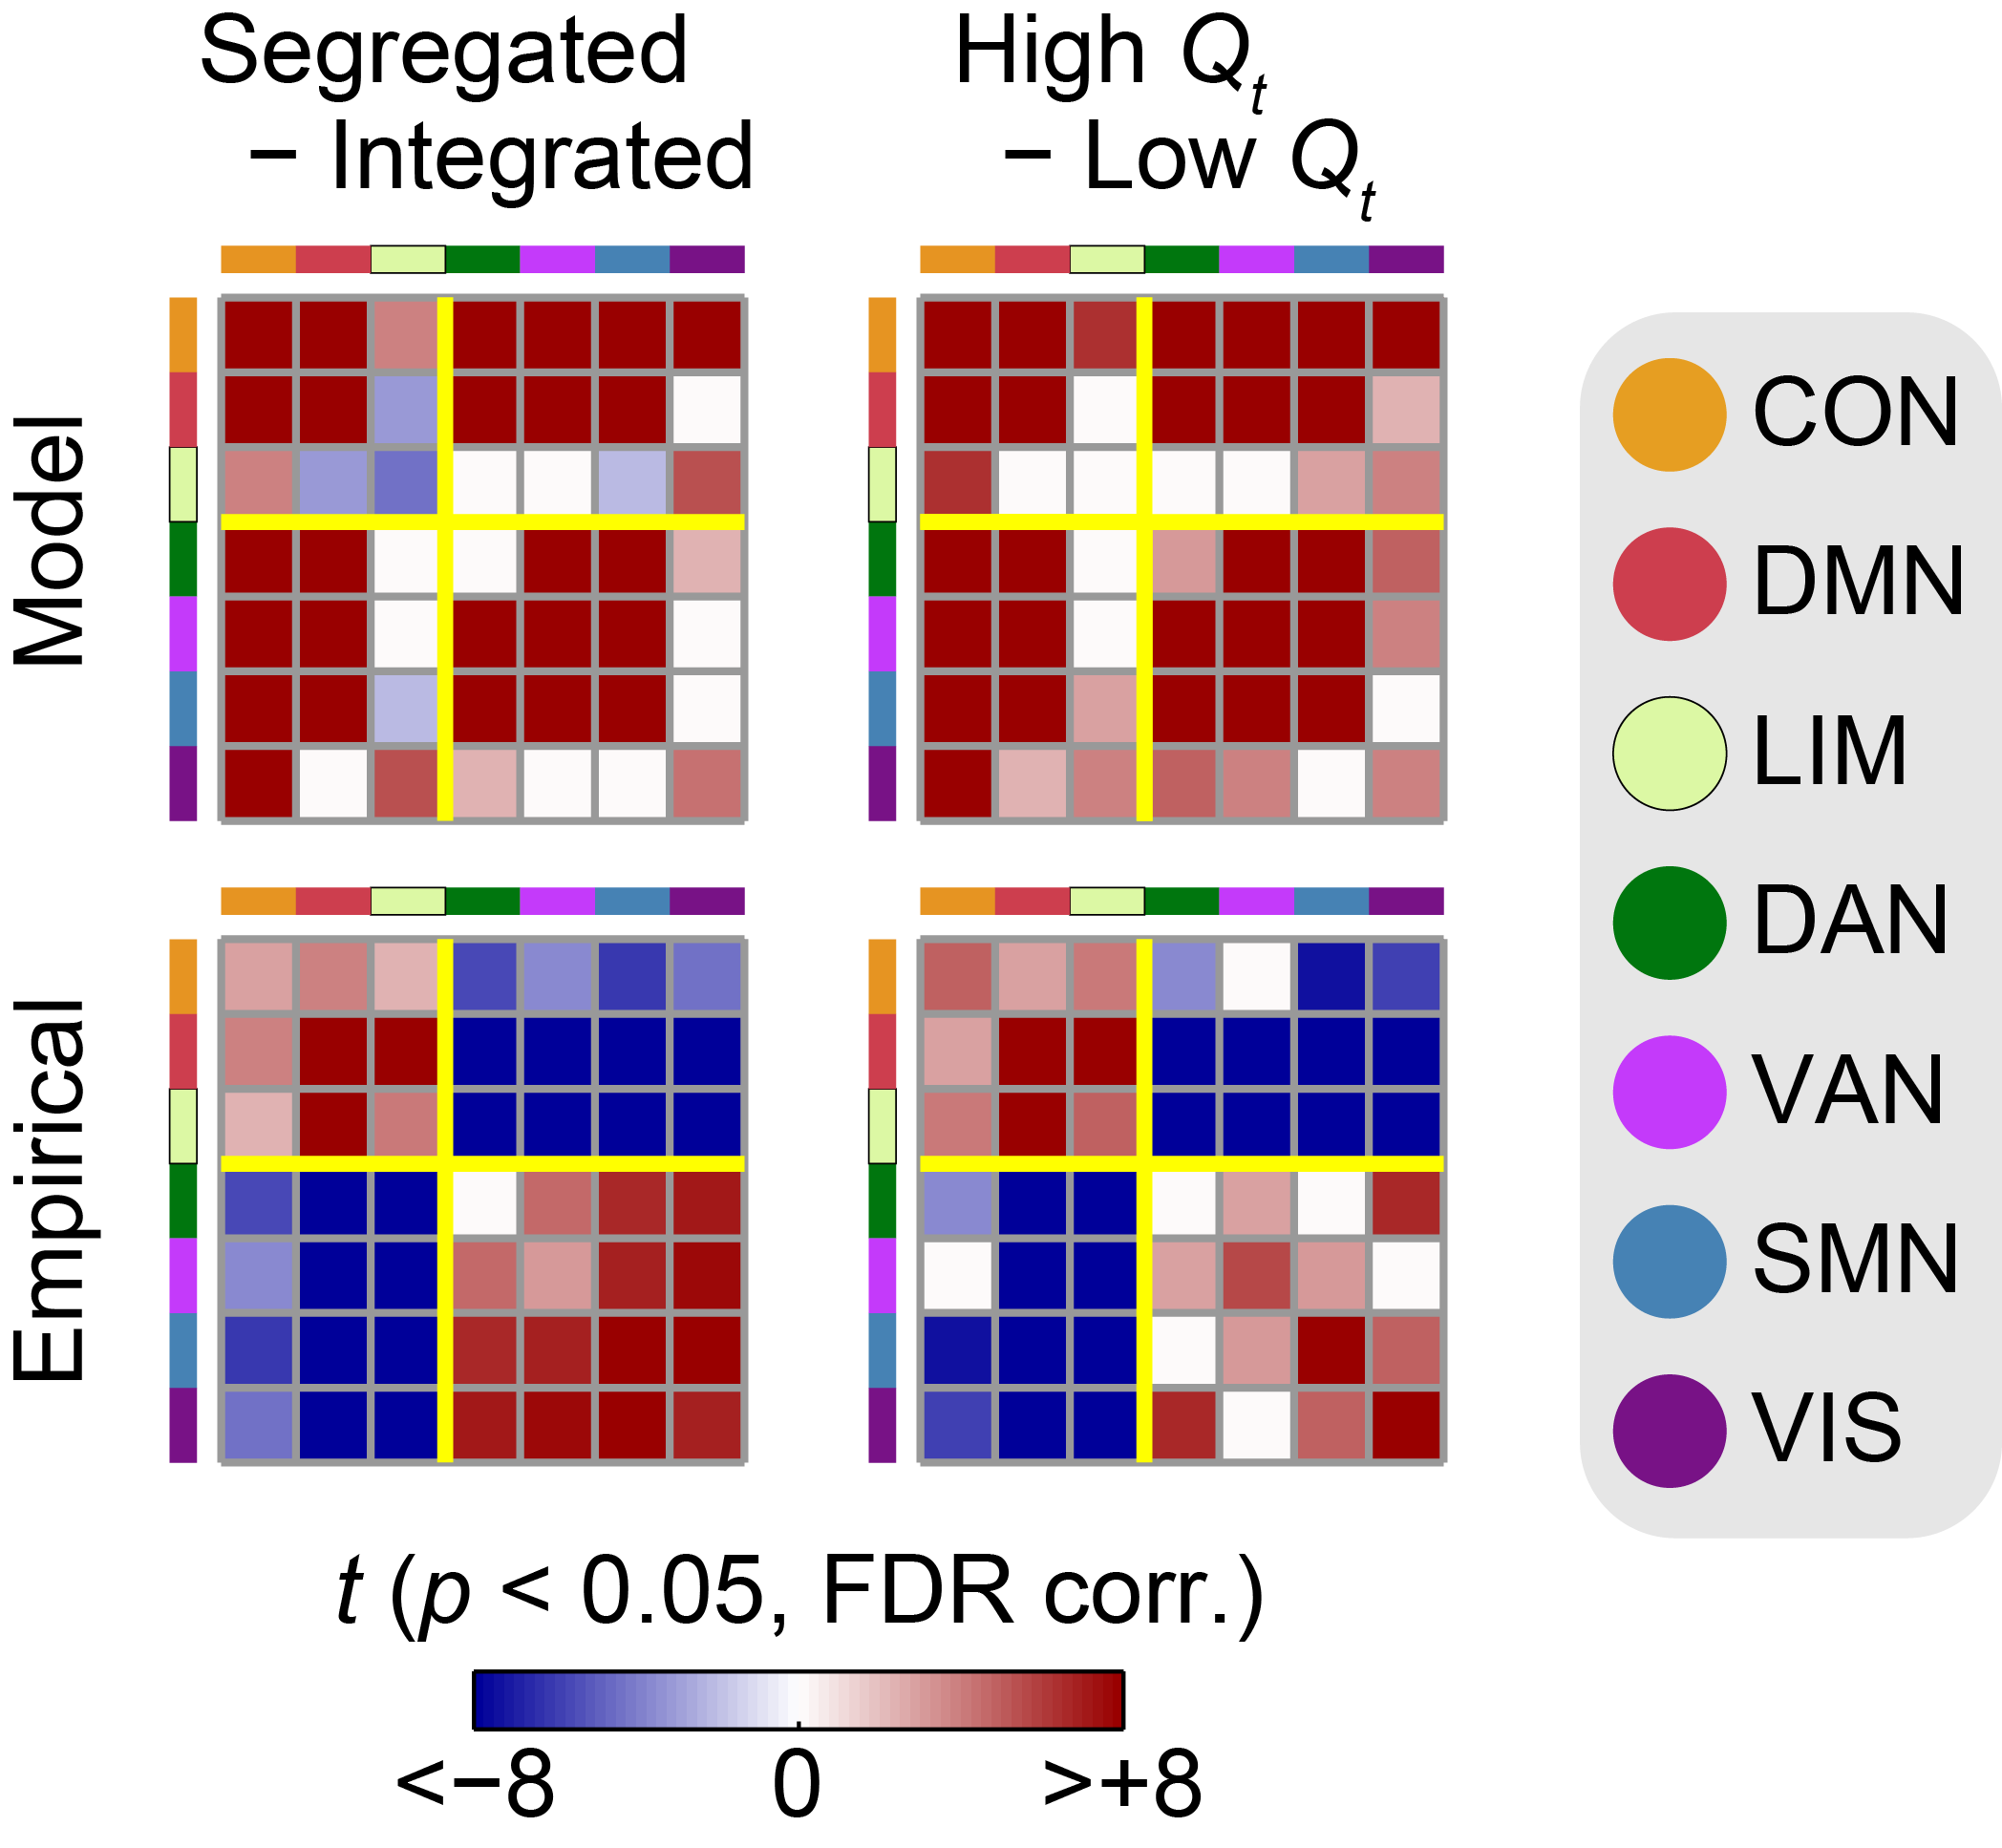

Supplement: Supplementary file 1 [file 1 › pcbi.1006497.s005.tif]

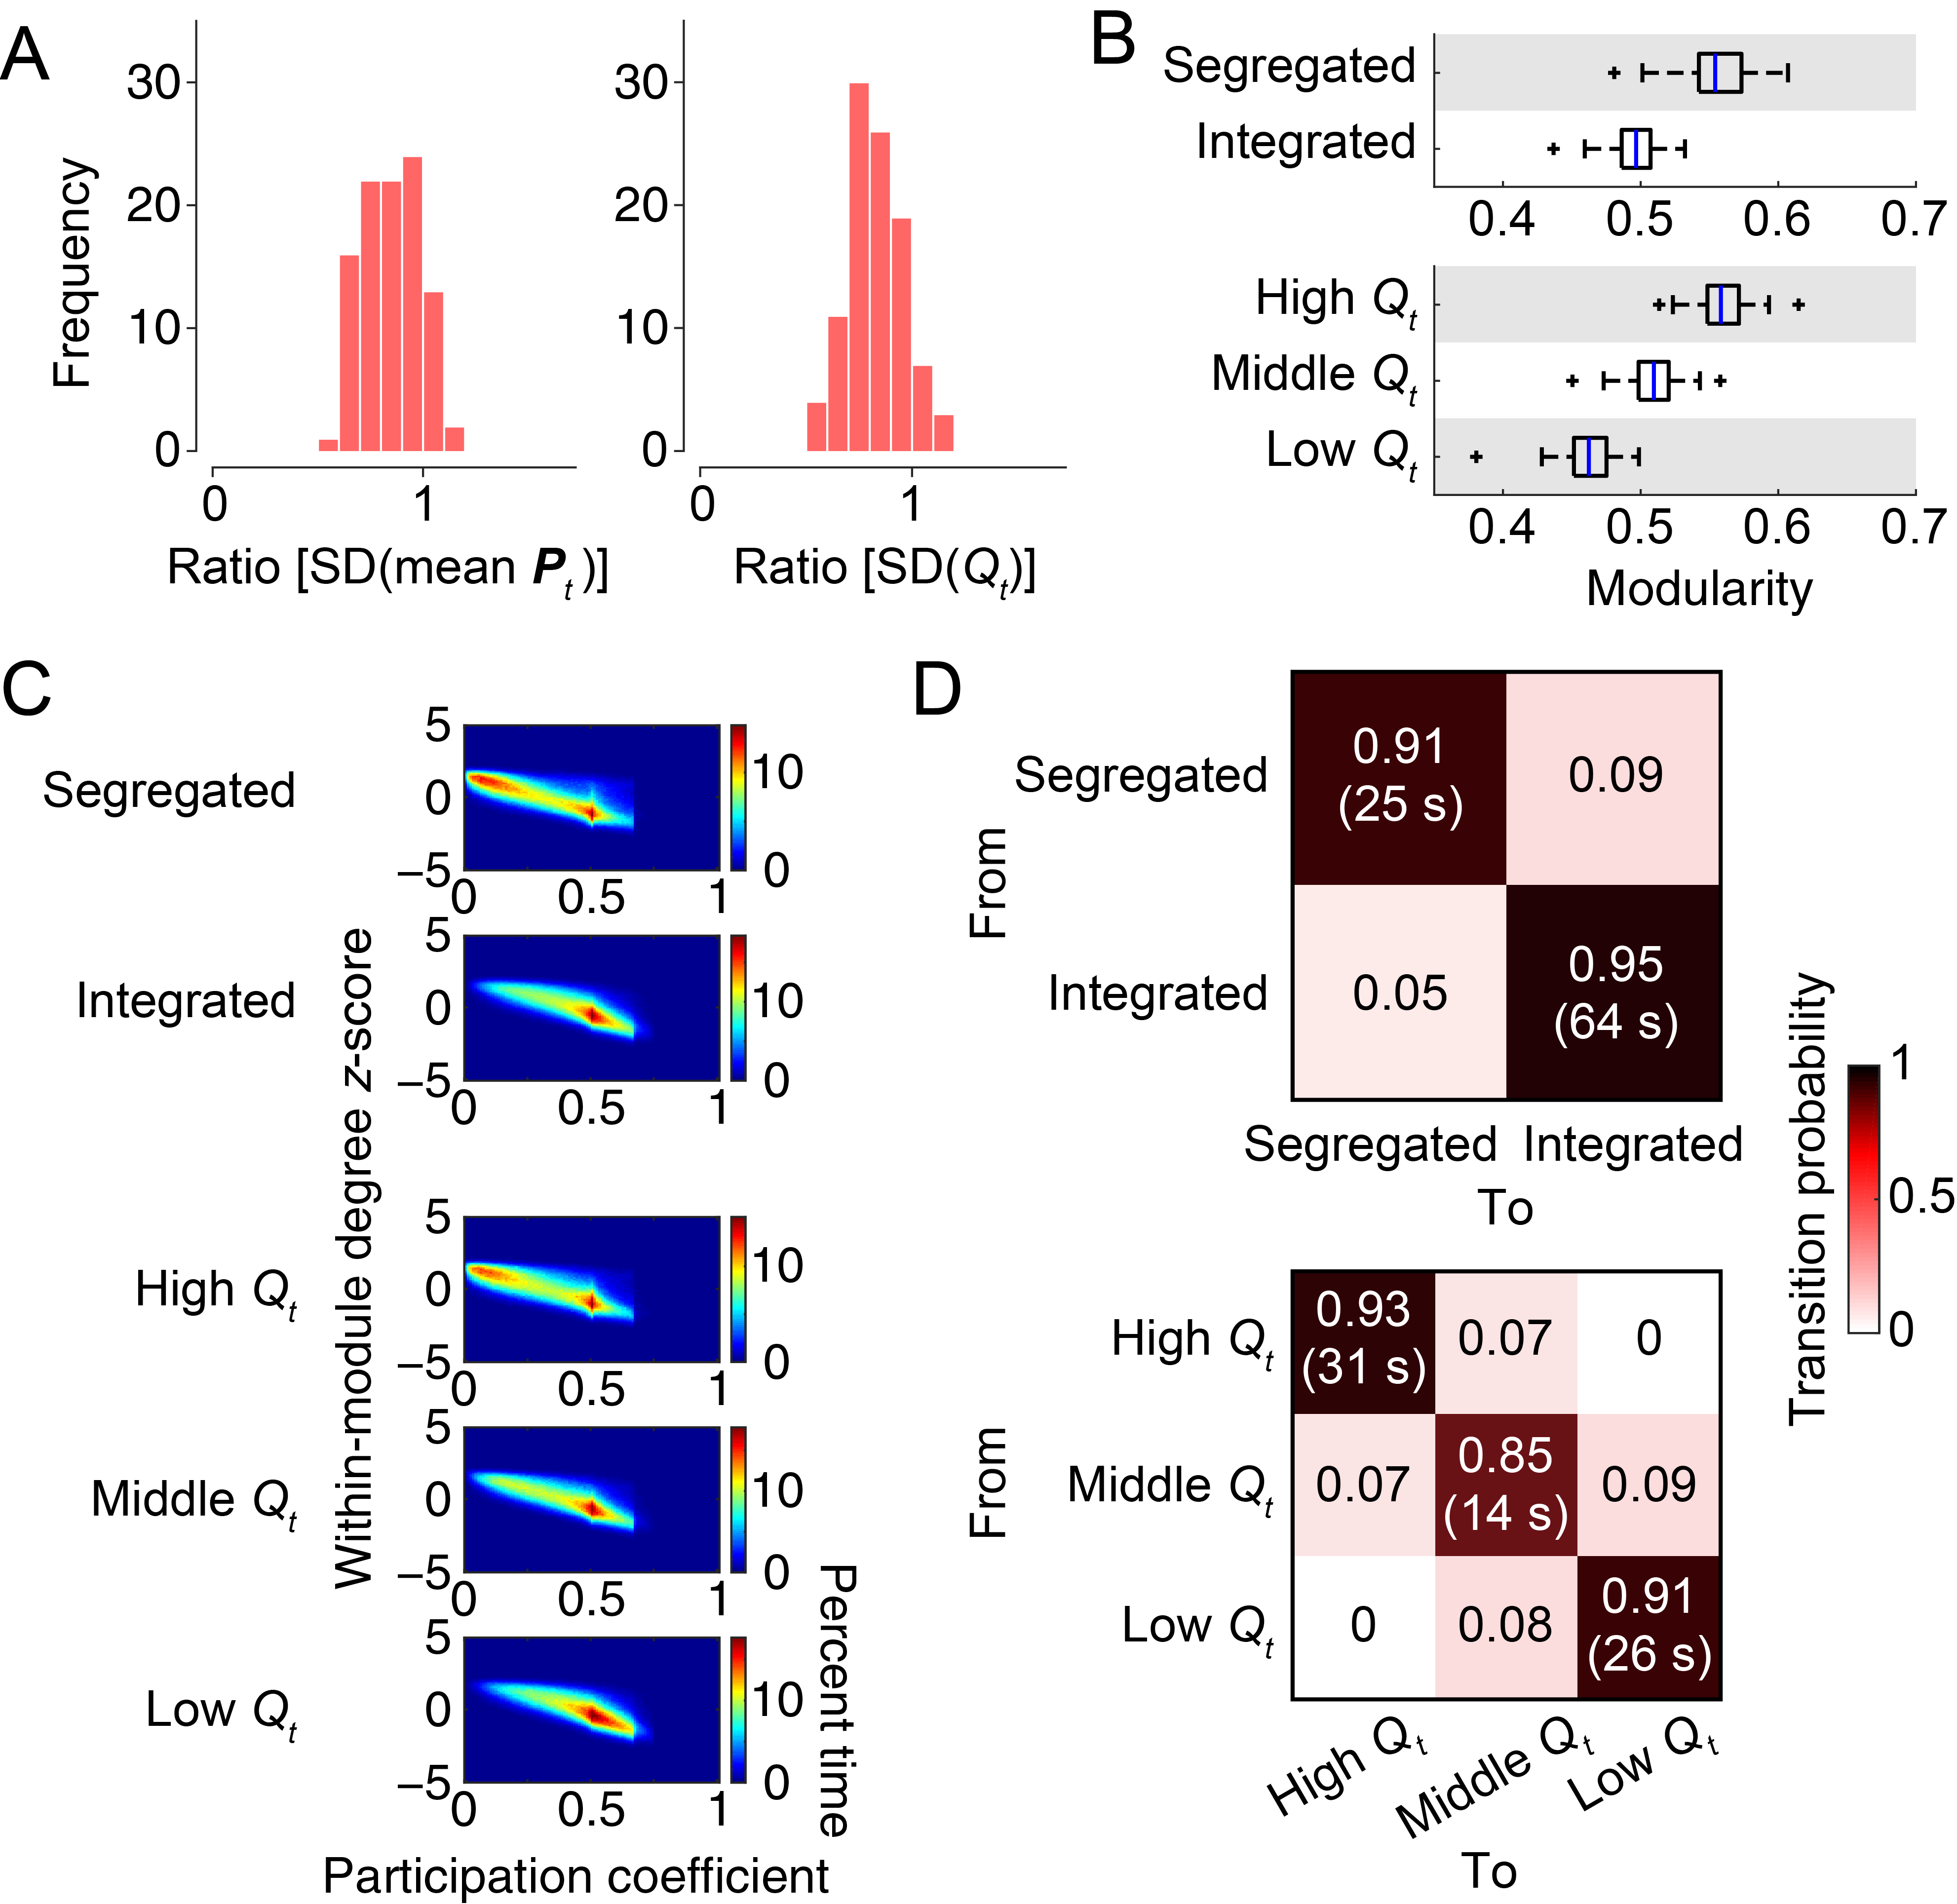

Supplement: Supplementary file 1 [file 1 › pcbi.1006497.s006.tif]

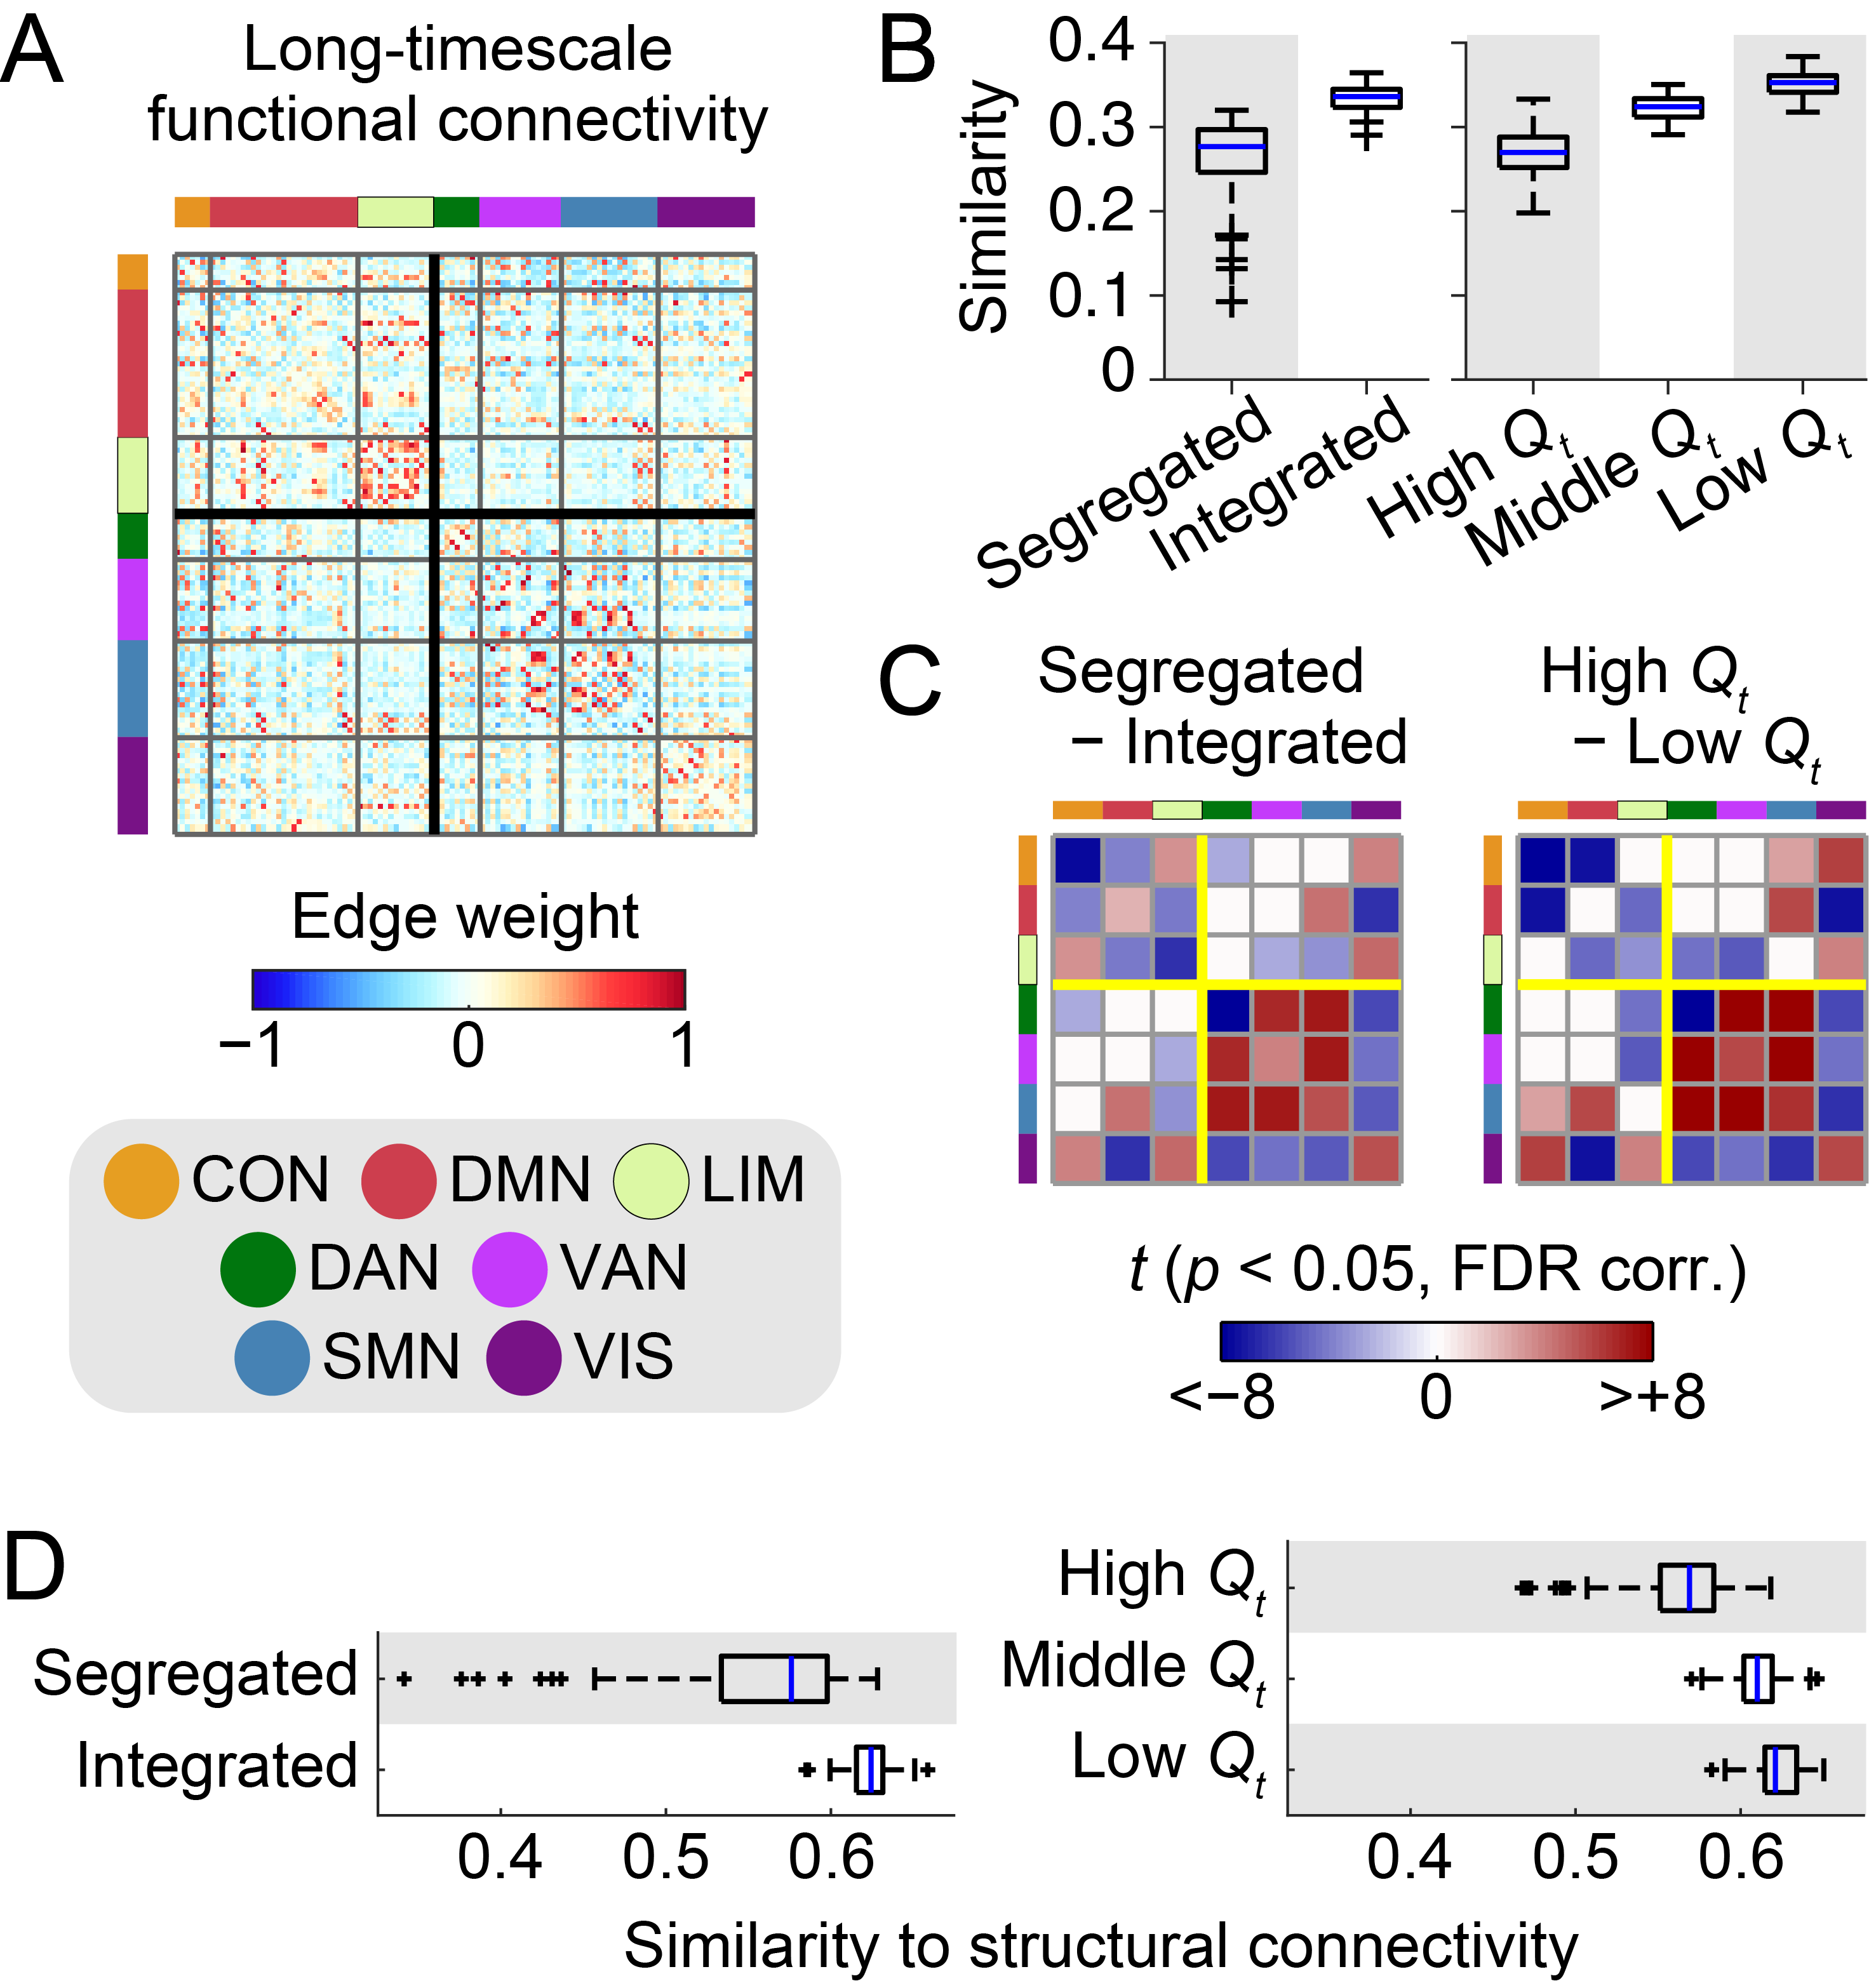

Supplement: Supplementary file 1 [file 1 › pcbi.1006497.s007.tif]
